# Supplementary material for: Effect of tailoring π-linkers with extended conjugation on the SJ-IC molecule for achieving high VOC and improved charge mobility towards enhanced photovoltaic applications
Source: Royal Society of Chemistry journal article supplement (doi:10.1039/d3ra03317a), 2023-01-01
Supplement: d3ra03317a1.pdf [file d3ra03317a1.pdf]

## Electronic Supplementary Information

### Effect of tailoring the $\pi$ -linkers with extended conjugation on the SJ-IC molecule for achieving high $V_{oc}$ and improved charge mobility towards enhanced photovoltaic applications

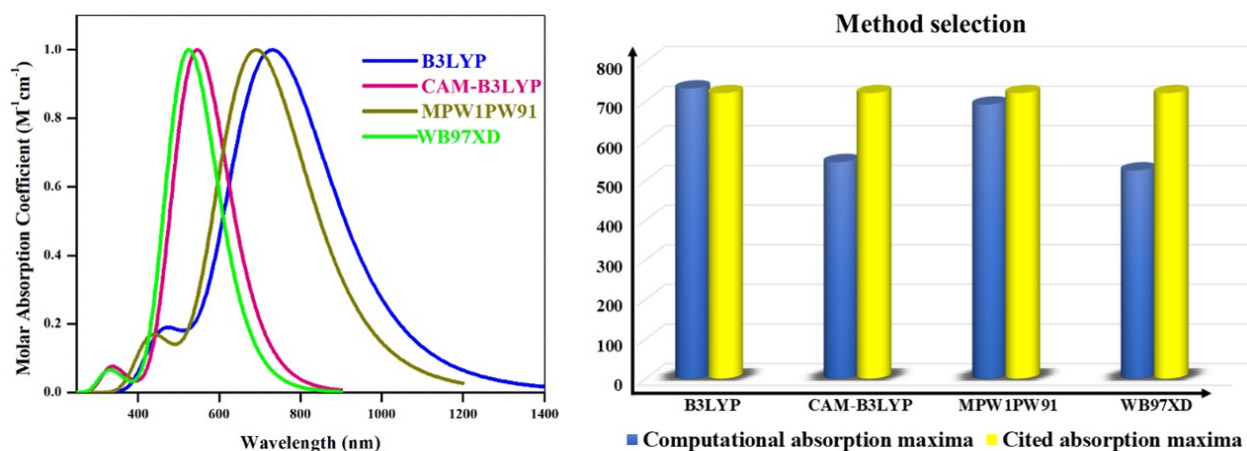

**Figure S1.** Origin graph (at left) for method selection through four basic levels of the DFT approach alongside a bar graph (at right) comparing  $\lambda_{max}$  from different functionals of DFT, revealing the selection of the best-suited functional.

#### Full width half maximum

Generally, a good absorption band is seen in absorption graphs of organic molecules with 50–150 nm FWHM. Broad absorption spectra indicate an efficient capability of the molecule for harvesting sunlight. In conceptualized molecules, the peaks with short wavelengths usually occur due to electronic transitions in lower frontier states. At the same time, an absorption band at a long wavelength appears due to ICT (of the donor to acceptor) from HOMO to LUMO. These long and short wavelength absorption bands co-exist, resulting in a wide spectrum. In the present research work, we calculated the full-width half maximum to look over the light-harvesting ability of our tailored molecules. The graphs were developed as provided in **Figure 11** and compared the resultant values of newly tailored molecules with those of R. The R molecule exhibited an FWHM at 306 nm. While all our modified molecules showed enough broader FWHM in contrast to R with values of 393 nm, 840 nm, 768 nm, 675 nm, 395 nm, 389 nm, and

382 nm for DL1–DL7, respectively. These higher values for FWHM of DL1–DL7 signify that all of these tailored molecules absorb in the wider area of the UV-Visible spectrum. The highest FWHM values for DL2 and DL3 depict high light harvesting capacity ensuring their remarkable potential to be used in manufacturing of improved OSCs in future.

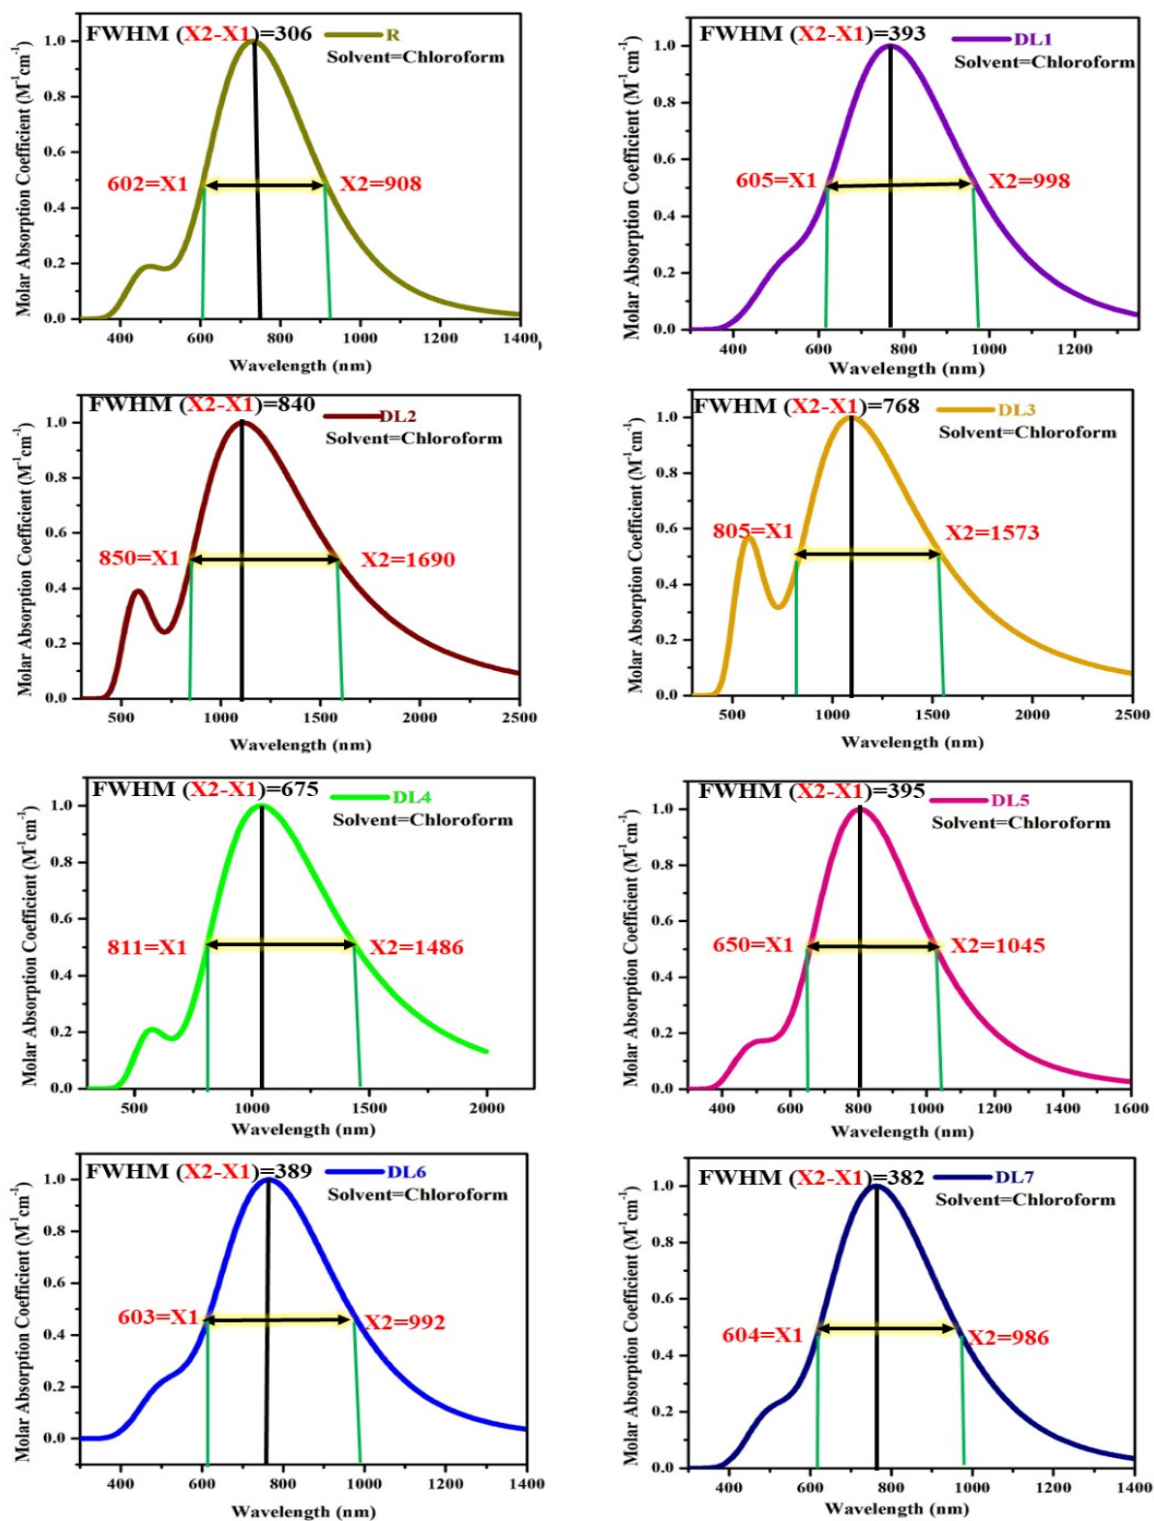

**Figure S2.** Pictorial representation of wide region absorption of studied molecules with their corresponding FWHM.

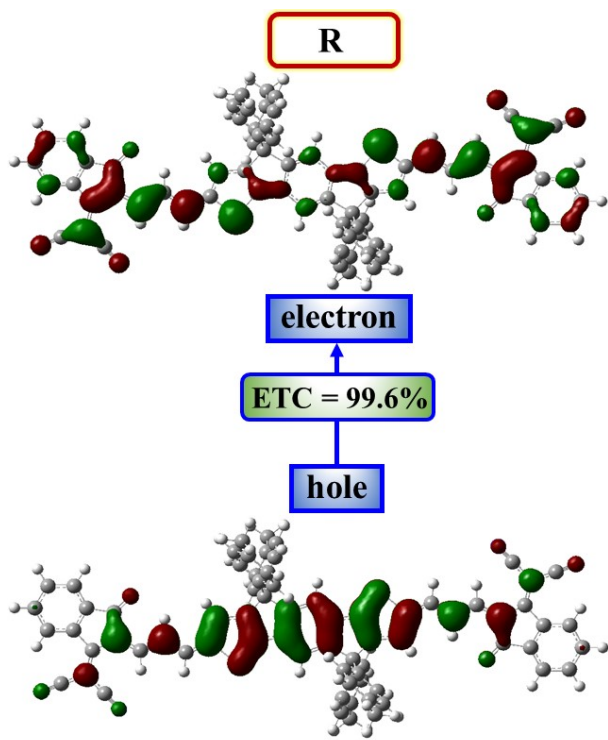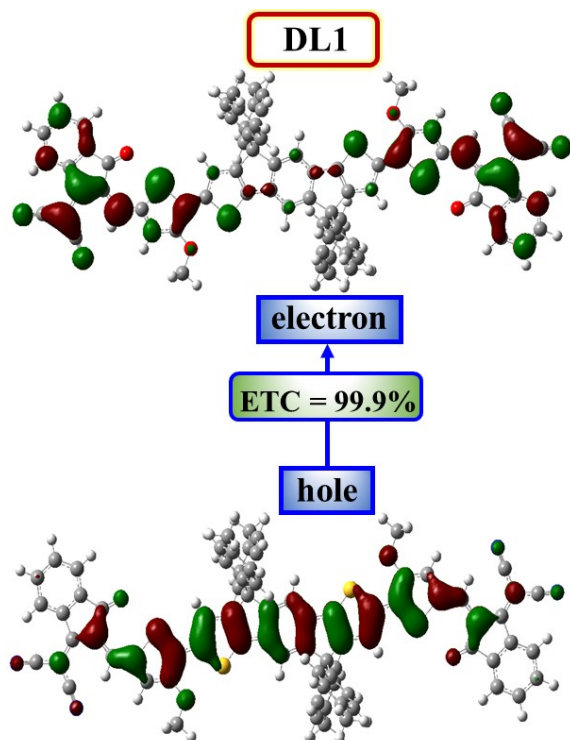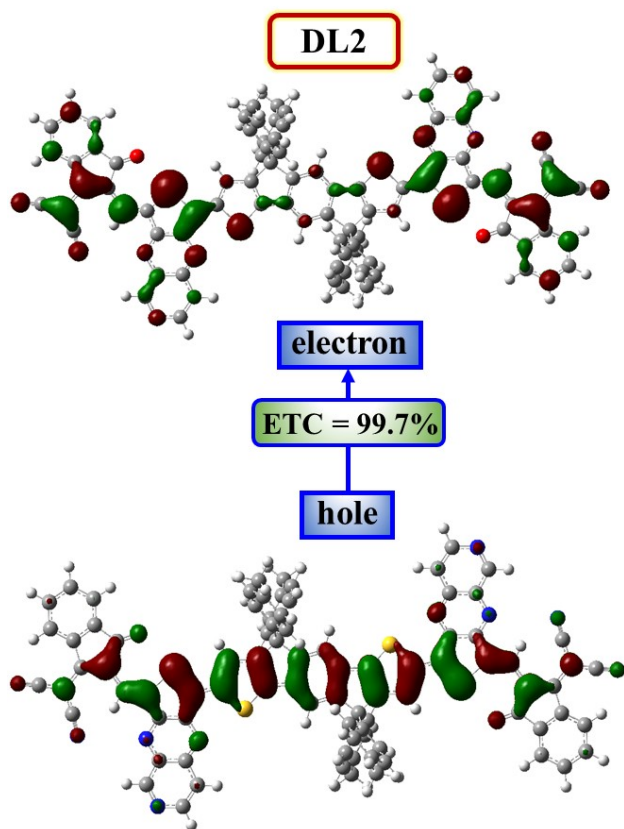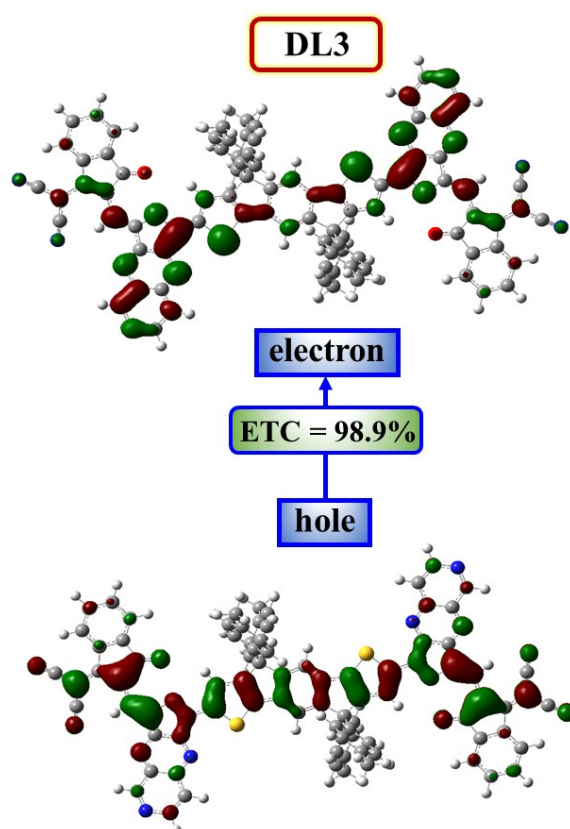

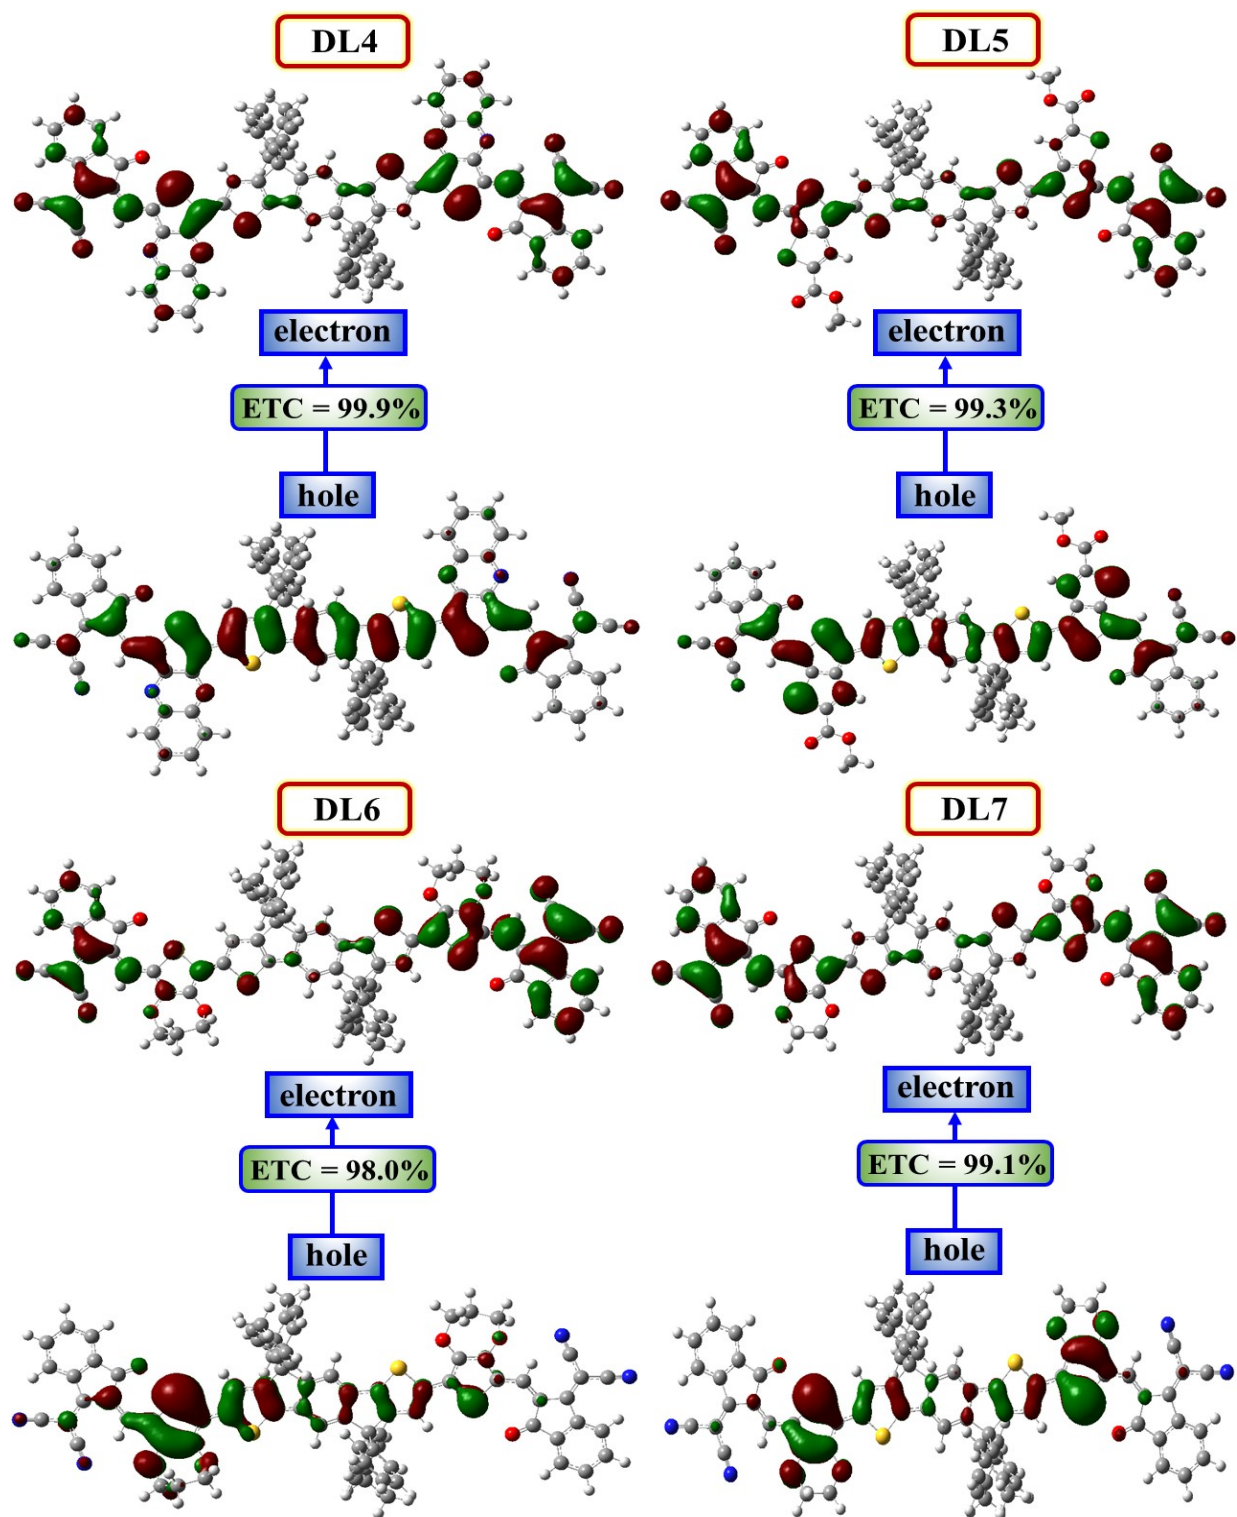

**Figure S3.** Visual representation of electronic transition contribution (ETC) from occupied-NTO to unoccupied-NTO.

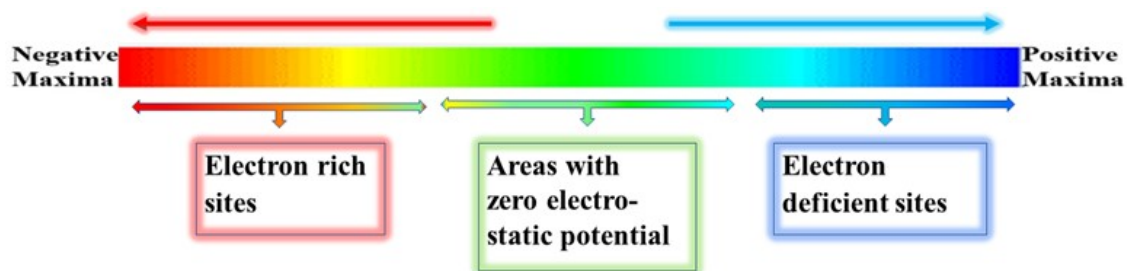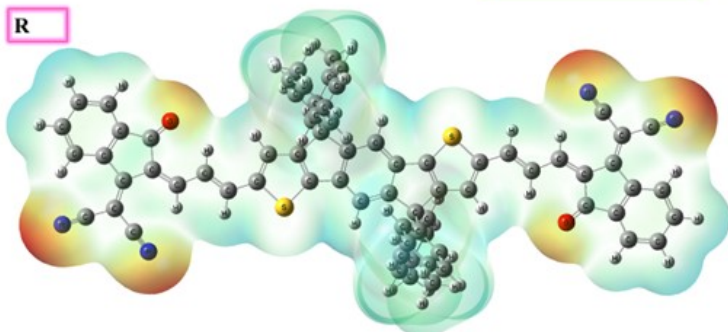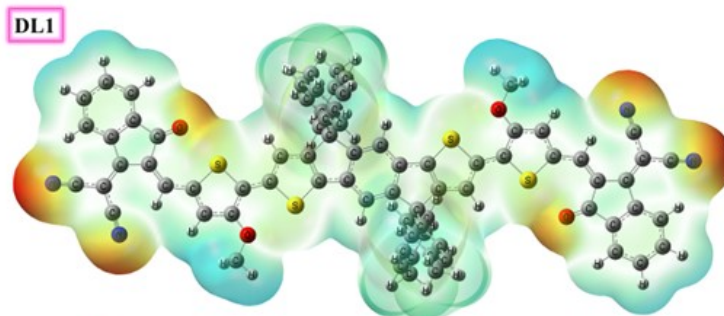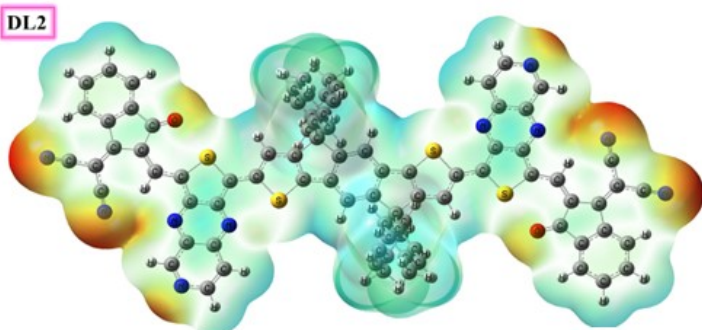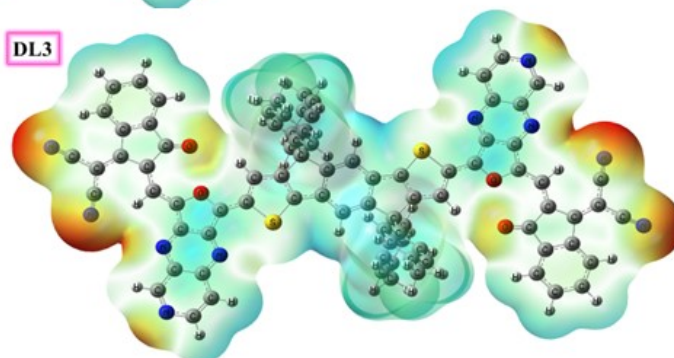

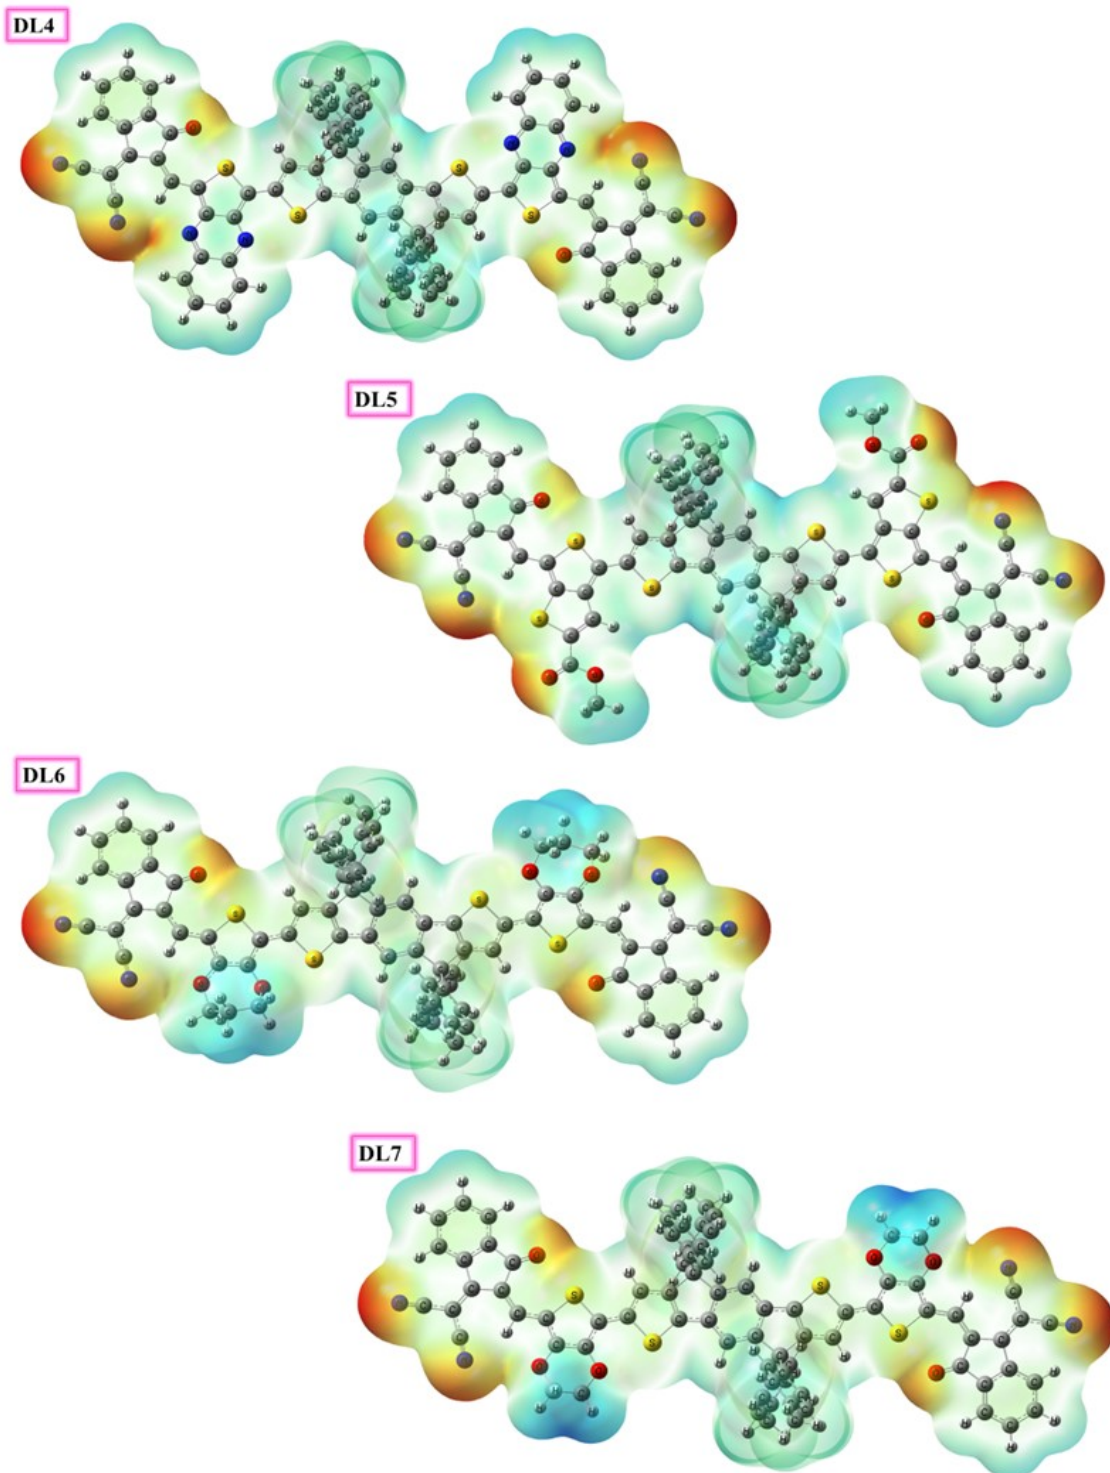

**Figure S4.** MEP map for studied molecules exposing electron density, reactive sites, nucleophilic and electrophilic regions.

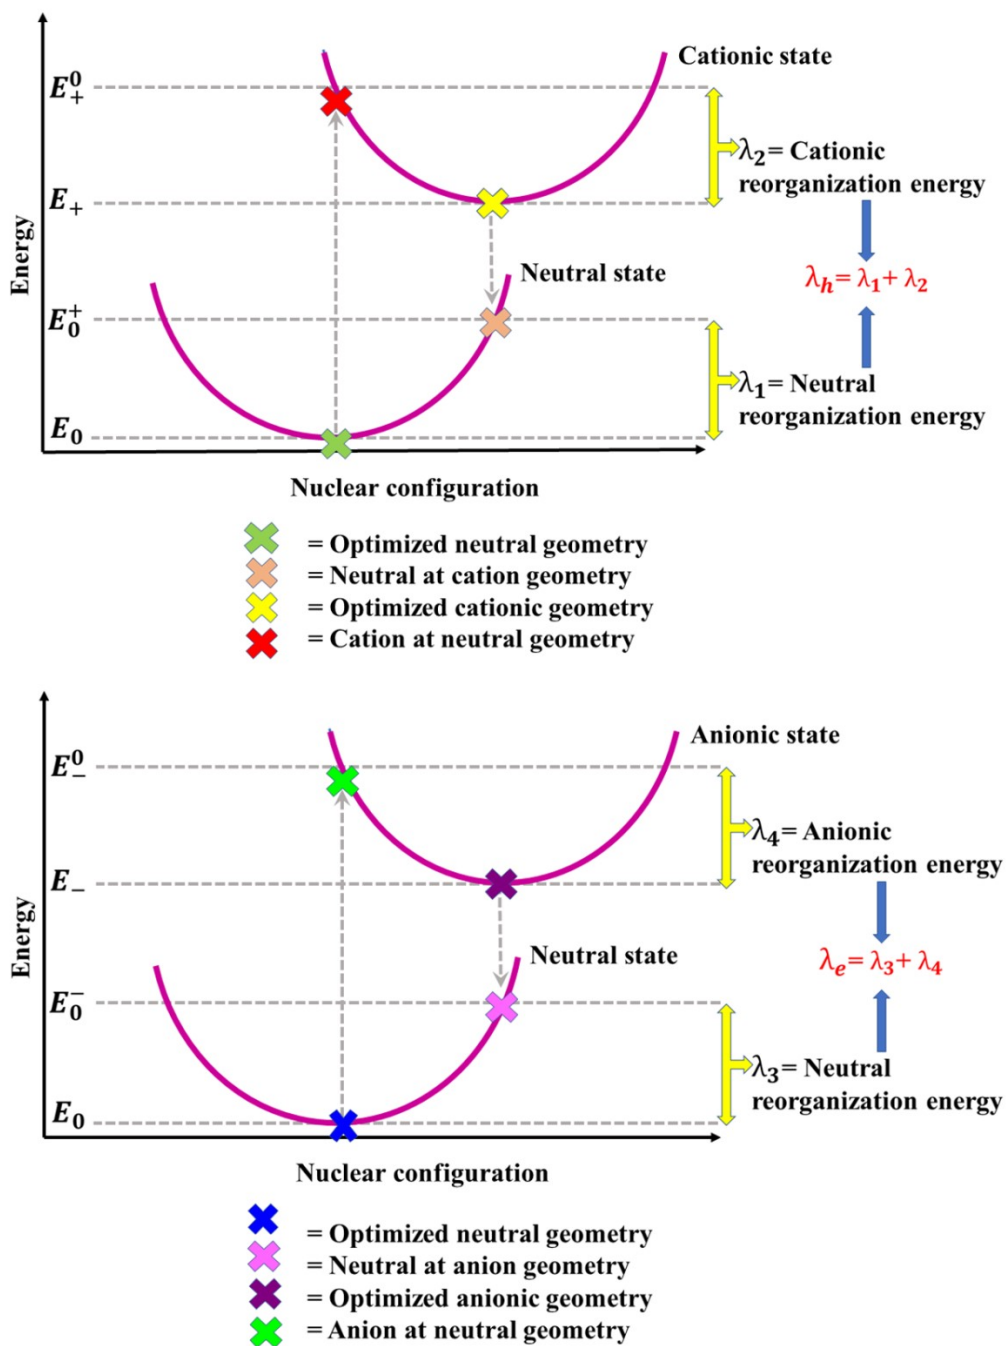

Figure S5. Reorganization energies for a hole (above) and electron (below).



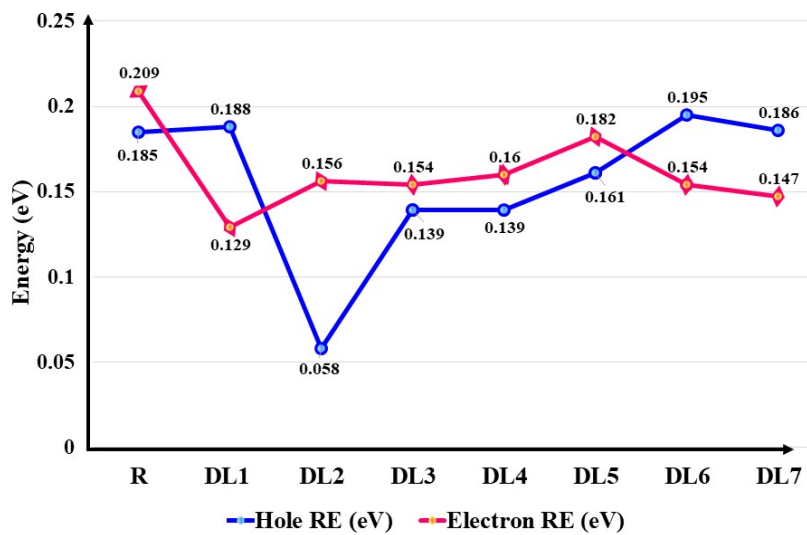

**Figure S6.** Comparison of electron and hole reorganization energies of designed molecules with those of reference.

Cartesian coordinates of internally optimized geometries of all molecules (reference **R**, and investigated molecules **DL1**, **DL2**, **DL3**, **DL4**, **DL5**, **DL6**, and **DL7** along X, Y and Z axis at B3LYP/6-31G (d, p) level of density functional theory (DFT).

**Cartesian coordinates of Reference Molecule R**

---

| Center<br>Number | Atomic<br>Number | Atomic<br>Type | Coordinates (Angstroms) |           |           |
|------------------|------------------|----------------|-------------------------|-----------|-----------|
|                  |                  |                | X                       | Y         | Z         |
| 1                | 6                | 0              | 1.049713                | 1.043082  | -0.076291 |
| 2                | 6                | 0              | 1.327821                | -0.287977 | -0.087942 |
| 3                | 6                | 0              | 2.346259                | 1.900166  | -0.030439 |
| 4                | 6                | 0              | 3.418281                | 0.843028  | -0.023165 |
| 5                | 6                | 0              | 2.879077                | -0.356787 | -0.060950 |
| 6                | 6                | 0              | 5.360729                | -0.590505 | 0.059851  |
| 7                | 6                | 0              | 4.952208                | 0.717570  | -0.077272 |
| 8                | 16               | 0              | 4.100734                | -1.685790 | 0.070978  |
| 9                | 1                | 0              | 5.613050                | 1.585686  | -0.108857 |
| 10               | 6                | 0              | 8.965817                | -1.772226 | 0.026759  |
| 11               | 6                | 0              | 7.799728                | -0.820216 | -0.046826 |
| 12               | 6                | 0              | 6.626446                | -1.465765 | 0.000869  |
| 13               | 6                | 0              | 12.183361               | 0.111115  | -0.047787 |
| 14               | 6                | 0              | 11.262071               | 1.084156  | -0.051767 |
| 15               | 6                | 0              | 11.591771               | 2.445264  | -0.087094 |

|    |   |   |           |           |           |
|----|---|---|-----------|-----------|-----------|
| 16 | 6 | 0 | 12.918540 | 2.723387  | -0.117471 |
| 17 | 6 | 0 | 13.910855 | 1.675332  | -0.113184 |
| 18 | 6 | 0 | 13.560575 | 0.365866  | -0.078589 |
| 19 | 6 | 0 | 11.499718 | -1.284788 | -0.005203 |
| 20 | 6 | 0 | 10.050444 | -0.985431 | 0.015011  |
| 21 | 6 | 0 | 9.830758  | 0.477923  | -0.012412 |
| 22 | 1 | 0 | 10.830277 | 3.238516  | -0.090147 |
| 23 | 1 | 0 | 13.279768 | 3.762315  | -0.146451 |
| 24 | 1 | 0 | 14.968067 | 1.979179  | -0.139158 |
| 25 | 1 | 0 | 14.311066 | -0.437800 | -0.075110 |
| 26 | 1 | 0 | 8.934508  | -2.840576 | 0.077240  |
| 27 | 1 | 0 | 7.896951  | 0.242308  | -0.127385 |
| 28 | 1 | 0 | 6.571811  | -2.534366 | -0.001885 |
| 29 | 8 | 0 | 8.735751  | 1.038095  | -0.004321 |
| 30 | 6 | 0 | 12.043893 | -2.509209 | 0.011117  |
| 31 | 6 | 0 | 10.599006 | -3.033920 | 0.103737  |
| 32 | 7 | 0 | 10.548814 | -4.190143 | 0.024813  |
| 33 | 6 | 0 | 13.423589 | -3.180173 | 0.144702  |
| 34 | 7 | 0 | 13.526392 | -4.332949 | 0.223059  |
| 35 | 6 | 0 | 2.562548  | 2.396239  | 2.885324  |
| 36 | 6 | 0 | 2.639112  | 3.589893  | 3.414437  |
| 37 | 6 | 0 | 2.665851  | 4.827994  | 2.499018  |
| 38 | 6 | 0 | 2.615298  | 4.701225  | 1.231974  |

|    |   |   |          |          |           |
|----|---|---|----------|----------|-----------|
| 39 | 6 | 0 | 2.525132 | 3.299247 | 0.587764  |
| 40 | 6 | 0 | 2.500592 | 2.241298 | 1.349261  |
| 41 | 1 | 0 | 2.542387 | 1.505663 | 3.530002  |
| 42 | 1 | 0 | 2.729616 | 5.830072 | 2.947425  |
| 43 | 1 | 0 | 2.635097 | 5.592151 | 0.587648  |
| 44 | 6 | 0 | 2.319685 | 2.299372 | -1.325465 |
| 45 | 6 | 0 | 2.325382 | 2.473516 | -2.860646 |
| 46 | 6 | 0 | 2.501643 | 3.656321 | -3.380082 |
| 47 | 6 | 0 | 2.702226 | 4.875300 | -2.451475 |
| 48 | 6 | 0 | 2.696931 | 4.730705 | -1.185169 |
| 49 | 6 | 0 | 2.491336 | 3.341285 | -0.553629 |
| 50 | 1 | 0 | 2.171723 | 1.302816 | -0.884866 |
| 51 | 1 | 0 | 2.182133 | 1.599519 | -3.512452 |
| 52 | 1 | 0 | 2.850550 | 5.871674 | -2.892536 |
| 53 | 1 | 0 | 2.840500 | 5.604351 | -0.532784 |
| 54 | 6 | 0 | 2.507986 | 3.828447 | -4.910419 |
| 55 | 1 | 0 | 1.596640 | 4.295510 | -5.220582 |
| 56 | 1 | 0 | 3.337791 | 4.440114 | -5.197101 |
| 57 | 1 | 0 | 2.593934 | 2.869309 | -5.376861 |
| 58 | 6 | 0 | 2.699825 | 3.745375 | 4.945364  |
| 59 | 1 | 0 | 1.890097 | 3.206263 | 5.391009  |
| 60 | 1 | 0 | 3.628880 | 3.356617 | 5.306783  |
| 61 | 1 | 0 | 2.622681 | 4.781275 | 5.201997  |

|    |    |   |            |           |           |
|----|----|---|------------|-----------|-----------|
| 62 | 1  | 0 | 2.437639   | 1.267143  | 0.911131  |
| 63 | 6  | 0 | -2.330209  | -1.786579 | -0.059231 |
| 64 | 6  | 0 | -3.411957  | -0.749456 | -0.052653 |
| 65 | 6  | 0 | -2.906381  | 0.464334  | -0.105862 |
| 66 | 6  | 0 | -5.392697  | 0.630729  | 0.029633  |
| 67 | 6  | 0 | -4.949088  | -0.666886 | -0.097482 |
| 68 | 16 | 0 | -4.163410  | 1.760396  | 0.021420  |
| 69 | 1  | 0 | -5.585876  | -1.553165 | -0.116049 |
| 70 | 6  | 0 | -9.029209  | 1.712209  | 0.009662  |
| 71 | 6  | 0 | -7.837762  | 0.792028  | -0.062588 |
| 72 | 6  | 0 | -6.682482  | 1.470126  | -0.029242 |
| 73 | 6  | 0 | -12.193890 | -0.259782 | -0.024430 |
| 74 | 6  | 0 | -11.246104 | -1.207042 | -0.025198 |
| 75 | 6  | 0 | -11.538283 | -2.577008 | -0.044952 |
| 76 | 6  | 0 | -12.857030 | -2.891897 | -0.063524 |
| 77 | 6  | 0 | -13.877883 | -1.871610 | -0.062697 |
| 78 | 6  | 0 | -13.563709 | -0.552705 | -0.043310 |
| 79 | 6  | 0 | -11.548825 | 1.154795  | -0.000183 |
| 80 | 6  | 0 | -10.091729 | 0.895729  | 0.013036  |
| 81 | 6  | 0 | -9.831866  | -0.561211 | -0.001575 |
| 82 | 1  | 0 | -10.755192 | -3.348952 | -0.045458 |
| 83 | 1  | 0 | -13.189587 | -3.940627 | -0.079867 |
| 84 | 1  | 0 | -14.926441 | -2.204736 | -0.078459 |

|     |   |   |            |           |           |
|-----|---|---|------------|-----------|-----------|
| 85  | 1 | 0 | -14.336088 | 0.229958  | -0.042555 |
| 86  | 1 | 0 | -9.027110  | 2.781466  | 0.049475  |
| 87  | 1 | 0 | -7.906107  | -0.273524 | -0.132082 |
| 88  | 1 | 0 | -6.657423  | 2.539746  | -0.042822 |
| 89  | 8 | 0 | -8.721765  | -1.090869 | 0.004500  |
| 90  | 6 | 0 | -12.126515 | 2.363848  | 0.007884  |
| 91  | 6 | 0 | -10.696105 | 2.929096  | 0.085474  |
| 92  | 7 | 0 | -10.678409 | 4.085419  | -0.005098 |
| 93  | 6 | 0 | -13.523321 | 2.997813  | 0.144342  |
| 94  | 7 | 0 | -13.657430 | 4.148039  | 0.212120  |
| 95  | 6 | 0 | -2.513535  | -2.259342 | 2.862658  |
| 96  | 6 | 0 | -2.553599  | -3.449320 | 3.403932  |
| 97  | 6 | 0 | -2.552124  | -4.696750 | 2.500872  |
| 98  | 6 | 0 | -2.513422  | -4.581270 | 1.232332  |
| 99  | 6 | 0 | -2.466277  | -3.183830 | 0.573838  |
| 100 | 6 | 0 | -2.465983  | -2.118069 | 1.324764  |
| 101 | 1 | 0 | -2.513759  | -1.362167 | 3.498440  |
| 102 | 1 | 0 | -2.585219  | -5.695686 | 2.959486  |
| 103 | 1 | 0 | -2.512824  | -5.478781 | 0.596903  |
| 104 | 6 | 0 | -2.301124  | -2.197788 | -1.350441 |
| 105 | 6 | 0 | -2.312096  | -2.387316 | -2.883771 |
| 106 | 6 | 0 | -2.459008  | -3.579650 | -3.390393 |
| 107 | 6 | 0 | -2.619715  | -4.794380 | -2.448555 |

|     |   |   |           |           |           |
|-----|---|---|-----------|-----------|-----------|
| 108 | 6 | 0 | -2.610096 | -4.637080 | -1.183791 |
| 109 | 6 | 0 | -2.438835 | -3.236294 | -0.567294 |
| 110 | 1 | 0 | -2.177869 | -1.193190 | -0.920635 |
| 111 | 1 | 0 | -2.197346 | -1.516241 | -3.545060 |
| 112 | 1 | 0 | -2.743339 | -5.798811 | -2.878824 |
| 113 | 1 | 0 | -2.725172 | -5.507806 | -0.521924 |
| 114 | 6 | 0 | -2.470650 | -3.767128 | -4.918895 |
| 115 | 1 | 0 | -1.548802 | -4.211953 | -5.230706 |
| 116 | 1 | 0 | -3.285098 | -4.404271 | -5.193892 |
| 117 | 1 | 0 | -2.586139 | -2.815422 | -5.394097 |
| 118 | 6 | 0 | -2.599927 | -3.591151 | 4.936687  |
| 119 | 1 | 0 | -1.802497 | -3.025502 | 5.371483  |
| 120 | 1 | 0 | -3.536976 | -3.224574 | 5.300637  |
| 121 | 1 | 0 | -2.492495 | -4.621920 | 5.202907  |
| 122 | 1 | 0 | -2.432860 | -1.146963 | 0.876705  |
| 123 | 6 | 0 | 0.291182  | -1.414463 | 0.079415  |
| 124 | 6 | 0 | -0.972894 | -1.077944 | 0.105485  |
| 125 | 6 | 0 | -1.369104 | 0.398079  | -0.042692 |
| 126 | 6 | 0 | -0.467015 | 1.287413  | -0.183247 |
| 127 | 1 | 0 | 0.571717  | -2.472736 | 0.182362  |
| 128 | 1 | 0 | -0.746969 | 2.345910  | -0.286610 |

-----  
**Cartesian coordinates of Designed Molecule DL1**

---

| Center<br>Number | Atomic<br>Number | Atomic<br>Type | Coordinates (Angstroms) |           |           |
|------------------|------------------|----------------|-------------------------|-----------|-----------|
|                  |                  |                | X                       | Y         | Z         |
| 1                | 6                | 0              | -1.051382               | 0.922841  | 0.077017  |
| 2                | 6                | 0              | -1.297645               | -0.476934 | 0.069642  |
| 3                | 6                | 0              | -2.374270               | 1.724562  | 0.056189  |
| 4                | 6                | 0              | -3.381841               | 0.572519  | 0.024891  |
| 5                | 6                | 0              | -2.730908               | -0.649681 | 0.049581  |
| 6                | 6                | 0              | -5.209475               | -0.875786 | 0.029011  |
| 7                | 6                | 0              | -4.779298               | 0.451807  | 0.017380  |
| 8                | 16               | 0              | -3.821607               | -1.988370 | 0.059546  |
| 9                | 1                | 0              | -5.470519               | 1.286363  | 0.008449  |
| 10               | 6                | 0              | -10.491615              | -1.492483 | -0.033411 |
| 11               | 6                | 0              | -13.449245              | 0.765344  | -0.120930 |
| 12               | 6                | 0              | -12.394806              | 1.697037  | -0.123103 |
| 13               | 6                | 0              | -12.607791              | 3.067904  | -0.152620 |
| 14               | 6                | 0              | -13.926181              | 3.527252  | -0.180739 |
| 15               | 6                | 0              | -14.986947              | 2.614310  | -0.178538 |
| 16               | 6                | 0              | -14.767869              | 1.232985  | -0.148967 |
| 17               | 6                | 0              | -12.875704              | -0.607846 | -0.087068 |
| 18               | 6                | 0              | -11.418378              | -0.468140 | -0.067457 |
| 19               | 6                | 0              | -11.102119              | 0.976158  | -0.089799 |



|    |   |   |            |           |           |
|----|---|---|------------|-----------|-----------|
| 20 | 1 | 0 | -11.760722 | 3.746417  | -0.153294 |
| 21 | 1 | 0 | -14.132352 | 4.592944  | -0.204278 |
| 22 | 1 | 0 | -16.008306 | 2.981987  | -0.200308 |
| 23 | 1 | 0 | -15.615570 | 0.561994  | -0.148405 |
| 24 | 1 | 0 | -10.900426 | -2.496255 | -0.019290 |
| 25 | 8 | 0 | -9.990788  | 1.496479  | -0.084419 |
| 26 | 6 | 0 | -13.626914 | -1.772270 | -0.078676 |
| 27 | 6 | 0 | -13.067786 | -3.086879 | -0.047742 |
| 28 | 7 | 0 | -12.644289 | -4.172796 | -0.022880 |
| 29 | 6 | 0 | -15.055431 | -1.788769 | -0.100944 |
| 30 | 7 | 0 | -16.219001 | -1.850272 | -0.118262 |
| 31 | 6 | 0 | -2.829992  | 2.874670  | -3.592516 |
| 32 | 6 | 0 | -2.278954  | 4.161200  | -3.587523 |
| 33 | 6 | 0 | -1.782853  | 4.648346  | -2.372216 |
| 34 | 6 | 0 | -1.842267  | 3.884963  | -1.207665 |
| 35 | 6 | 0 | -2.399983  | 2.598628  | -1.214968 |
| 36 | 6 | 0 | -2.889530  | 2.106063  | -2.430660 |
| 37 | 1 | 0 | -3.220447  | 2.463483  | -4.520235 |
| 38 | 1 | 0 | -1.344998  | 5.642906  | -2.333175 |
| 39 | 1 | 0 | -1.461075  | 4.301623  | -0.280818 |
| 40 | 6 | 0 | -1.893232  | 2.338726  | 2.516131  |
| 41 | 6 | 0 | -2.198912  | 3.043174  | 3.682600  |
| 42 | 6 | 0 | -3.238705  | 3.976346  | 3.719296  |

|    |    |   |           |           |           |
|----|----|---|-----------|-----------|-----------|
| 43 | 6  | 0 | -3.970783 | 4.177764  | 2.540596  |
| 44 | 6  | 0 | -3.668956 | 3.479385  | 1.375447  |
| 45 | 6  | 0 | -2.619707 | 2.546883  | 1.339661  |
| 46 | 1  | 0 | -1.080911 | 1.620670  | 2.531400  |
| 47 | 1  | 0 | -1.613980 | 2.859076  | 4.580397  |
| 48 | 1  | 0 | -4.790594 | 4.892046  | 2.534646  |
| 49 | 1  | 0 | -4.250432 | 3.668699  | 0.478251  |
| 50 | 6  | 0 | -3.551991 | 4.758076  | 4.972546  |
| 51 | 1  | 0 | -3.139857 | 5.773560  | 4.921716  |
| 52 | 1  | 0 | -4.631864 | 4.856575  | 5.122879  |
| 53 | 1  | 0 | -3.129621 | 4.277602  | 5.859508  |
| 54 | 6  | 0 | -2.247725 | 5.004304  | -4.839805 |
| 55 | 1  | 0 | -2.158867 | 4.384798  | -5.737220 |
| 56 | 1  | 0 | -3.166016 | 5.595849  | -4.943506 |
| 57 | 1  | 0 | -1.409144 | 5.706911  | -4.828423 |
| 58 | 1  | 0 | -3.319208 | 1.110868  | -2.475974 |
| 59 | 6  | 0 | 2.374240  | -1.724258 | 0.054798  |
| 60 | 6  | 0 | 3.381807  | -0.572219 | 0.023467  |
| 61 | 6  | 0 | 2.730900  | 0.649985  | 0.048714  |
| 62 | 6  | 0 | 5.209459  | 0.876056  | 0.026911  |
| 63 | 6  | 0 | 4.779258  | -0.451530 | 0.015231  |
| 64 | 16 | 0 | 3.821624  | 1.988657  | 0.058260  |
| 65 | 1  | 0 | 5.470455  | -1.286099 | 0.005646  |

|    |   |   |           |           |           |
|----|---|---|-----------|-----------|-----------|
| 66 | 6 | 0 | 10.491587 | 1.492616  | -0.035339 |
| 67 | 6 | 0 | 13.448606 | -0.766171 | -0.120800 |
| 68 | 6 | 0 | 12.393857 | -1.697484 | -0.122521 |
| 69 | 6 | 0 | 12.606394 | -3.068427 | -0.151679 |
| 70 | 6 | 0 | 13.924638 | -3.528200 | -0.180049 |
| 71 | 6 | 0 | 14.985708 | -2.615601 | -0.178455 |
| 72 | 6 | 0 | 14.767072 | -1.234203 | -0.149145 |
| 73 | 6 | 0 | 12.875655 | 0.607222  | -0.086889 |
| 74 | 6 | 0 | 11.418212 | 0.468091  | -0.067666 |
| 75 | 6 | 0 | 11.101442 | -0.976111 | -0.089502 |
| 76 | 1 | 0 | 11.759109 | -3.746671 | -0.151951 |
| 77 | 1 | 0 | 14.130461 | -4.593963 | -0.203357 |
| 78 | 1 | 0 | 16.006941 | -2.983612 | -0.200498 |
| 79 | 1 | 0 | 15.614958 | -0.563419 | -0.149046 |
| 80 | 1 | 0 | 10.900420 | 2.496363  | -0.022494 |
| 81 | 8 | 0 | 9.989929  | -1.496035 | -0.083342 |
| 82 | 6 | 0 | 13.627890 | 1.770993  | -0.077316 |
| 83 | 6 | 0 | 13.070297 | 3.086222  | -0.045109 |
| 84 | 7 | 0 | 12.649278 | 4.173077  | -0.019215 |
| 85 | 6 | 0 | 15.056431 | 1.785864  | -0.099264 |
| 86 | 7 | 0 | 16.220109 | 1.845409  | -0.116348 |
| 87 | 6 | 0 | 2.829435  | -2.873145 | -3.594344 |
| 88 | 6 | 0 | 2.277360  | -4.159234 | -3.589998 |

|     |   |   |          |           |           |
|-----|---|---|----------|-----------|-----------|
| 89  | 6 | 0 | 1.780714 | -4.646520 | -2.374972 |
| 90  | 6 | 0 | 1.840627 | -3.883720 | -1.210062 |
| 91  | 6 | 0 | 2.399436 | -2.597855 | -1.216704 |
| 92  | 6 | 0 | 2.889468 | -2.105119 | -2.432132 |
| 93  | 1 | 0 | 3.220309 | -2.461846 | -4.521837 |
| 94  | 1 | 0 | 1.342021 | -5.640731 | -2.336436 |
| 95  | 1 | 0 | 1.458940 | -4.300476 | -0.283466 |
| 96  | 6 | 0 | 1.893485 | -2.339706 | 2.514454  |
| 97  | 6 | 0 | 2.199597 | -3.044340 | 3.680693  |
| 98  | 6 | 0 | 3.240042 | -3.976802 | 3.717117  |
| 99  | 6 | 0 | 3.972331 | -4.177279 | 2.538393  |
| 100 | 6 | 0 | 3.670068 | -3.478712 | 1.373466  |
| 101 | 6 | 0 | 2.620141 | -2.546963 | 1.337935  |
| 102 | 1 | 0 | 1.080678 | -1.622203 | 2.529942  |
| 103 | 1 | 0 | 1.614502 | -2.860946 | 4.578528  |
| 104 | 1 | 0 | 4.792668 | -4.890954 | 2.532250  |
| 105 | 1 | 0 | 4.251758 | -3.667271 | 0.476251  |
| 106 | 6 | 0 | 3.553770 | -4.758766 | 4.970110  |
| 107 | 1 | 0 | 3.141351 | -5.774141 | 4.919362  |
| 108 | 1 | 0 | 4.633690 | -4.857543 | 5.119892  |
| 109 | 1 | 0 | 3.131947 | -4.278309 | 5.857346  |
| 110 | 6 | 0 | 2.245578 | -5.001742 | -4.842668 |
| 111 | 1 | 0 | 2.157506 | -4.381745 | -5.739821 |

|     |    |   |           |           |           |
|-----|----|---|-----------|-----------|-----------|
| 112 | 1  | 0 | 3.163317  | -5.594130 | -4.946443 |
| 113 | 1  | 0 | 1.406315  | -5.703542 | -4.831777 |
| 114 | 1  | 0 | 3.319932  | -1.110240 | -2.476952 |
| 115 | 6  | 0 | -0.246663 | -1.406974 | 0.065314  |
| 116 | 6  | 0 | 1.051375  | -0.922530 | 0.076365  |
| 117 | 6  | 0 | 1.297640  | 0.477244  | 0.069242  |
| 118 | 6  | 0 | 0.246656  | 1.407284  | 0.065564  |
| 119 | 1  | 0 | -0.446788 | -2.473654 | 0.045077  |
| 120 | 1  | 0 | 0.446779  | 2.473968  | 0.045517  |
| 121 | 6  | 0 | 9.076960  | 1.539797  | -0.014544 |
| 122 | 6  | 0 | 8.412036  | 2.775766  | 0.016683  |
| 123 | 6  | 0 | 7.019529  | 2.672921  | 0.033494  |
| 124 | 6  | 0 | 6.561387  | 1.342753  | 0.016159  |
| 125 | 16 | 0 | 7.905364  | 0.222487  | -0.022541 |
| 126 | 1  | 0 | 8.960820  | 3.709108  | 0.026208  |
| 127 | 6  | 0 | -6.561398 | -1.342507 | 0.018475  |
| 128 | 6  | 0 | -7.019539 | -2.672650 | 0.037477  |
| 129 | 6  | 0 | -8.412046 | -2.775508 | 0.020754  |
| 130 | 6  | 0 | -9.076984 | -1.539583 | -0.012113 |
| 131 | 16 | 0 | -7.905374 | -0.222297 | -0.021922 |
| 132 | 1  | 0 | -8.960821 | -3.708840 | 0.031537  |
| 133 | 8  | 0 | -6.118269 | -3.685126 | 0.068321  |
| 134 | 8  | 0 | 6.118258  | 3.685432  | 0.063064  |

|     |   |   |           |           |           |
|-----|---|---|-----------|-----------|-----------|
| 135 | 6 | 0 | -6.624087 | -5.017741 | 0.084478  |
| 136 | 6 | 0 | 6.624107  | 5.018044  | 0.078533  |
| 137 | 1 | 0 | -7.214821 | -5.227095 | -0.815042 |
| 138 | 1 | 0 | -5.751294 | -5.670043 | 0.106875  |
| 139 | 1 | 0 | -7.237829 | -5.196699 | 0.975083  |
| 140 | 1 | 0 | 5.751324  | 5.670370  | 0.100544  |
| 141 | 1 | 0 | 7.237807  | 5.197454  | 0.969084  |
| 142 | 1 | 0 | 7.214894  | 5.226914  | -0.821058 |

-----

**Cartesian coordinates of Designed Molecule DL2**

-----

| Center | Atomic | Atomic | Coordinates (Angstroms) |   |   |
|--------|--------|--------|-------------------------|---|---|
| Number | Number | Type   | X                       | Y | Z |

-----

|   |    |   |           |           |          |
|---|----|---|-----------|-----------|----------|
| 1 | 6  | 0 | -1.051382 | 0.922841  | 0.077017 |
| 2 | 6  | 0 | -1.297645 | -0.476934 | 0.069642 |
| 3 | 6  | 0 | -2.374270 | 1.724562  | 0.056189 |
| 4 | 6  | 0 | -3.381841 | 0.572519  | 0.024891 |
| 5 | 6  | 0 | -2.730908 | -0.649681 | 0.049581 |
| 6 | 6  | 0 | -5.209475 | -0.875786 | 0.029011 |
| 7 | 6  | 0 | -4.779298 | 0.451807  | 0.017380 |
| 8 | 16 | 0 | -3.821607 | -1.988370 | 0.059546 |
| 9 | 1  | 0 | -5.470519 | 1.286363  | 0.008449 |

|    |   |   |            |           |           |
|----|---|---|------------|-----------|-----------|
| 10 | 6 | 0 | -10.491615 | -1.492483 | -0.033411 |
| 11 | 6 | 0 | -13.449245 | 0.765344  | -0.120930 |
| 12 | 6 | 0 | -12.394806 | 1.697037  | -0.123103 |
| 13 | 6 | 0 | -12.607791 | 3.067904  | -0.152620 |
| 14 | 6 | 0 | -13.926181 | 3.527252  | -0.180739 |
| 15 | 6 | 0 | -14.986947 | 2.614310  | -0.178538 |
| 16 | 6 | 0 | -14.767869 | 1.232985  | -0.148967 |
| 17 | 6 | 0 | -12.875704 | -0.607846 | -0.087068 |
| 18 | 6 | 0 | -11.418378 | -0.468140 | -0.067457 |
| 19 | 6 | 0 | -11.102119 | 0.976158  | -0.089799 |
| 20 | 1 | 0 | -11.760722 | 3.746417  | -0.153294 |
| 21 | 1 | 0 | -14.132352 | 4.592944  | -0.204278 |
| 22 | 1 | 0 | -16.008306 | 2.981987  | -0.200308 |
| 23 | 1 | 0 | -15.615570 | 0.561994  | -0.148405 |
| 24 | 1 | 0 | -10.900426 | -2.496255 | -0.019290 |
| 25 | 8 | 0 | -9.990788  | 1.496479  | -0.084419 |
| 26 | 6 | 0 | -13.626914 | -1.772270 | -0.078676 |
| 27 | 6 | 0 | -13.067786 | -3.086879 | -0.047742 |
| 28 | 7 | 0 | -12.644289 | -4.172796 | -0.022880 |
| 29 | 6 | 0 | -15.055431 | -1.788769 | -0.100944 |
| 30 | 7 | 0 | -16.219001 | -1.850272 | -0.118262 |
| 31 | 6 | 0 | -2.829992  | 2.874670  | -3.592516 |
| 32 | 6 | 0 | -2.278954  | 4.161200  | -3.587523 |

|    |   |   |           |          |           |
|----|---|---|-----------|----------|-----------|
| 33 | 6 | 0 | -1.782853 | 4.648346 | -2.372216 |
| 34 | 6 | 0 | -1.842267 | 3.884963 | -1.207665 |
| 35 | 6 | 0 | -2.399983 | 2.598628 | -1.214968 |
| 36 | 6 | 0 | -2.889530 | 2.106063 | -2.430660 |
| 37 | 1 | 0 | -3.220447 | 2.463483 | -4.520235 |
| 38 | 1 | 0 | -1.344998 | 5.642906 | -2.333175 |
| 39 | 1 | 0 | -1.461075 | 4.301623 | -0.280818 |
| 40 | 6 | 0 | -1.893232 | 2.338726 | 2.516131  |
| 41 | 6 | 0 | -2.198912 | 3.043174 | 3.682600  |
| 42 | 6 | 0 | -3.238705 | 3.976346 | 3.719296  |
| 43 | 6 | 0 | -3.970783 | 4.177764 | 2.540596  |
| 44 | 6 | 0 | -3.668956 | 3.479385 | 1.375447  |
| 45 | 6 | 0 | -2.619707 | 2.546883 | 1.339661  |
| 46 | 1 | 0 | -1.080911 | 1.620670 | 2.531400  |
| 47 | 1 | 0 | -1.613980 | 2.859076 | 4.580397  |
| 48 | 1 | 0 | -4.790594 | 4.892046 | 2.534646  |
| 49 | 1 | 0 | -4.250432 | 3.668699 | 0.478251  |
| 50 | 6 | 0 | -3.551991 | 4.758076 | 4.972546  |
| 51 | 1 | 0 | -3.139857 | 5.773560 | 4.921716  |
| 52 | 1 | 0 | -4.631864 | 4.856575 | 5.122879  |
| 53 | 1 | 0 | -3.129621 | 4.277602 | 5.859508  |
| 54 | 6 | 0 | -2.247725 | 5.004304 | -4.839805 |
| 55 | 1 | 0 | -2.158867 | 4.384798 | -5.737220 |



|    |    |   |           |           |           |
|----|----|---|-----------|-----------|-----------|
| 56 | 1  | 0 | -3.166016 | 5.595849  | -4.943506 |
| 57 | 1  | 0 | -1.409144 | 5.706911  | -4.828423 |
| 58 | 1  | 0 | -3.319208 | 1.110868  | -2.475974 |
| 59 | 6  | 0 | 2.374240  | -1.724258 | 0.054798  |
| 60 | 6  | 0 | 3.381807  | -0.572219 | 0.023467  |
| 61 | 6  | 0 | 2.730900  | 0.649985  | 0.048714  |
| 62 | 6  | 0 | 5.209459  | 0.876056  | 0.026911  |
| 63 | 6  | 0 | 4.779258  | -0.451530 | 0.015231  |
| 64 | 16 | 0 | 3.821624  | 1.988657  | 0.058260  |
| 65 | 1  | 0 | 5.470455  | -1.286099 | 0.005646  |
| 66 | 6  | 0 | 10.491587 | 1.492616  | -0.035339 |
| 67 | 6  | 0 | 13.448606 | -0.766171 | -0.120800 |
| 68 | 6  | 0 | 12.393857 | -1.697484 | -0.122521 |
| 69 | 6  | 0 | 12.606394 | -3.068427 | -0.151679 |
| 70 | 6  | 0 | 13.924638 | -3.528200 | -0.180049 |
| 71 | 6  | 0 | 14.985708 | -2.615601 | -0.178455 |
| 72 | 6  | 0 | 14.767072 | -1.234203 | -0.149145 |
| 73 | 6  | 0 | 12.875655 | 0.607222  | -0.086889 |
| 74 | 6  | 0 | 11.418212 | 0.468091  | -0.067666 |
| 75 | 6  | 0 | 11.101442 | -0.976111 | -0.089502 |
| 76 | 1  | 0 | 11.759109 | -3.746671 | -0.151951 |
| 77 | 1  | 0 | 14.130461 | -4.593963 | -0.203357 |
| 78 | 1  | 0 | 16.006941 | -2.983612 | -0.200498 |

|     |   |   |           |           |           |
|-----|---|---|-----------|-----------|-----------|
| 79  | 1 | 0 | 15.614958 | -0.563419 | -0.149046 |
| 80  | 1 | 0 | 10.900420 | 2.496363  | -0.022494 |
| 81  | 8 | 0 | 9.989929  | -1.496035 | -0.083342 |
| 82  | 6 | 0 | 13.627890 | 1.770993  | -0.077316 |
| 83  | 6 | 0 | 13.070297 | 3.086222  | -0.045109 |
| 84  | 7 | 0 | 12.649278 | 4.173077  | -0.019215 |
| 85  | 6 | 0 | 15.056431 | 1.785864  | -0.099264 |
| 86  | 7 | 0 | 16.220109 | 1.845409  | -0.116348 |
| 87  | 6 | 0 | 2.829435  | -2.873145 | -3.594344 |
| 88  | 6 | 0 | 2.277360  | -4.159234 | -3.589998 |
| 89  | 6 | 0 | 1.780714  | -4.646520 | -2.374972 |
| 90  | 6 | 0 | 1.840627  | -3.883720 | -1.210062 |
| 91  | 6 | 0 | 2.399436  | -2.597855 | -1.216704 |
| 92  | 6 | 0 | 2.889468  | -2.105119 | -2.432132 |
| 93  | 1 | 0 | 3.220309  | -2.461846 | -4.521837 |
| 94  | 1 | 0 | 1.342021  | -5.640731 | -2.336436 |
| 95  | 1 | 0 | 1.458940  | -4.300476 | -0.283466 |
| 96  | 6 | 0 | 1.893485  | -2.339706 | 2.514454  |
| 97  | 6 | 0 | 2.199597  | -3.044340 | 3.680693  |
| 98  | 6 | 0 | 3.240042  | -3.976802 | 3.717117  |
| 99  | 6 | 0 | 3.972331  | -4.177279 | 2.538393  |
| 100 | 6 | 0 | 3.670068  | -3.478712 | 1.373466  |
| 101 | 6 | 0 | 2.620141  | -2.546963 | 1.337935  |

|     |   |   |           |           |           |
|-----|---|---|-----------|-----------|-----------|
| 102 | 1 | 0 | 1.080678  | -1.622203 | 2.529942  |
| 103 | 1 | 0 | 1.614502  | -2.860946 | 4.578528  |
| 104 | 1 | 0 | 4.792668  | -4.890954 | 2.532250  |
| 105 | 1 | 0 | 4.251758  | -3.667271 | 0.476251  |
| 106 | 6 | 0 | 3.553770  | -4.758766 | 4.970110  |
| 107 | 1 | 0 | 3.141351  | -5.774141 | 4.919362  |
| 108 | 1 | 0 | 4.633690  | -4.857543 | 5.119892  |
| 109 | 1 | 0 | 3.131947  | -4.278309 | 5.857346  |
| 110 | 6 | 0 | 2.245578  | -5.001742 | -4.842668 |
| 111 | 1 | 0 | 2.157506  | -4.381745 | -5.739821 |
| 112 | 1 | 0 | 3.163317  | -5.594130 | -4.946443 |
| 113 | 1 | 0 | 1.406315  | -5.703542 | -4.831777 |
| 114 | 1 | 0 | 3.319932  | -1.110240 | -2.476952 |
| 115 | 6 | 0 | -0.246663 | -1.406974 | 0.065314  |
| 116 | 6 | 0 | 1.051375  | -0.922530 | 0.076365  |
| 117 | 6 | 0 | 1.297640  | 0.477244  | 0.069242  |
| 118 | 6 | 0 | 0.246656  | 1.407284  | 0.065564  |
| 119 | 1 | 0 | -0.446788 | -2.473654 | 0.045077  |
| 120 | 1 | 0 | 0.446779  | 2.473968  | 0.045517  |
| 121 | 6 | 0 | 9.076960  | 1.539797  | -0.014544 |
| 122 | 6 | 0 | 8.412036  | 2.775766  | 0.016683  |
| 123 | 6 | 0 | 7.019529  | 2.672921  | 0.033494  |
| 124 | 6 | 0 | 6.561387  | 1.342753  | 0.016159  |

|     |    |   |           |           |           |
|-----|----|---|-----------|-----------|-----------|
| 125 | 16 | 0 | 7.905364  | 0.222487  | -0.022541 |
| 126 | 1  | 0 | 8.960820  | 3.709108  | 0.026208  |
| 127 | 6  | 0 | -6.561398 | -1.342507 | 0.018475  |
| 128 | 6  | 0 | -7.019539 | -2.672650 | 0.037477  |
| 129 | 6  | 0 | -8.412046 | -2.775508 | 0.020754  |
| 130 | 6  | 0 | -9.076984 | -1.539583 | -0.012113 |
| 131 | 16 | 0 | -7.905374 | -0.222297 | -0.021922 |
| 132 | 1  | 0 | -8.960821 | -3.708840 | 0.031537  |
| 133 | 8  | 0 | -6.118269 | -3.685126 | 0.068321  |
| 134 | 8  | 0 | 6.118258  | 3.685432  | 0.063064  |
| 135 | 6  | 0 | -6.624087 | -5.017741 | 0.084478  |
| 136 | 6  | 0 | 6.624107  | 5.018044  | 0.078533  |
| 137 | 1  | 0 | -7.214821 | -5.227095 | -0.815042 |
| 138 | 1  | 0 | -5.751294 | -5.670043 | 0.106875  |
| 139 | 1  | 0 | -7.237829 | -5.196699 | 0.975083  |
| 140 | 1  | 0 | 5.751324  | 5.670370  | 0.100544  |
| 141 | 1  | 0 | 7.237807  | 5.197454  | 0.969084  |
| 142 | 1  | 0 | 7.214894  | 5.226914  | -0.821058 |

-----

**Cartesian coordinates of Designed Molecule DL3**

-----

| Center | Atomic | Atomic | Coordinates (Angstroms) |   |   |
|--------|--------|--------|-------------------------|---|---|
| Number | Number | Type   | X                       | Y | Z |

---

|    |    |   |            |           |           |
|----|----|---|------------|-----------|-----------|
| 1  | 6  | 0 | -1.089185  | 0.881190  | 0.137469  |
| 2  | 6  | 0 | -1.274434  | -0.530221 | 0.128326  |
| 3  | 6  | 0 | -2.442732  | 1.627288  | 0.114749  |
| 4  | 6  | 0 | -3.401142  | 0.434949  | 0.067972  |
| 5  | 6  | 0 | -2.694536  | -0.763202 | 0.099801  |
| 6  | 6  | 0 | -5.137657  | -1.098822 | 0.050288  |
| 7  | 6  | 0 | -4.787827  | 0.256775  | 0.042187  |
| 8  | 16 | 0 | -3.718762  | -2.155950 | 0.098826  |
| 9  | 1  | 0 | -5.542679  | 1.034371  | 0.018691  |
| 10 | 6  | 0 | -9.926925  | -0.726821 | -0.092349 |
| 11 | 6  | 0 | -11.615159 | 2.590637  | -0.266707 |
| 12 | 6  | 0 | -10.267617 | 2.986369  | -0.249976 |
| 13 | 6  | 0 | -9.877401  | 4.316935  | -0.306126 |
| 14 | 6  | 0 | -10.873382 | 5.291963  | -0.382403 |
| 15 | 6  | 0 | -12.221352 | 4.915340  | -0.400479 |
| 16 | 6  | 0 | -12.609786 | 3.573000  | -0.343398 |
| 17 | 6  | 0 | -11.676056 | 1.105101  | -0.192245 |
| 18 | 6  | 0 | -10.299471 | 0.609205  | -0.141237 |
| 19 | 6  | 0 | -9.390489  | 1.793132  | -0.167461 |
| 20 | 1  | 0 | -8.821852  | 4.569147  | -0.290782 |
| 21 | 1  | 0 | -10.606757 | 6.343531  | -0.428421 |
| 22 | 1  | 0 | -12.989467 | 5.680394  | -0.460458 |

|    |   |   |            |           |           |
|----|---|---|------------|-----------|-----------|
| 23 | 1 | 0 | -13.661945 | 3.326159  | -0.360371 |
| 24 | 1 | 0 | -10.719624 | -1.468266 | -0.093087 |
| 25 | 8 | 0 | -8.167318  | 1.829065  | -0.133980 |
| 26 | 6 | 0 | -12.855207 | 0.375984  | -0.171714 |
| 27 | 6 | 0 | -12.931823 | -1.048078 | -0.086665 |
| 28 | 7 | 0 | -13.052941 | -2.205433 | -0.017332 |
| 29 | 6 | 0 | -14.150664 | 0.976426  | -0.229908 |
| 30 | 7 | 0 | -15.228024 | 1.418535  | -0.275536 |
| 31 | 6 | 0 | -2.919405  | 2.797043  | -3.524797 |
| 32 | 6 | 0 | -2.427849  | 4.107250  | -3.499509 |
| 33 | 6 | 0 | -1.965714  | 4.602301  | -2.273901 |
| 34 | 6 | 0 | -2.001144  | 3.823727  | -1.118495 |
| 35 | 6 | 0 | -2.498657  | 2.513428  | -1.147214 |
| 36 | 6 | 0 | -2.953295  | 2.012496  | -2.372768 |
| 37 | 1 | 0 | -3.283189  | 2.380056  | -4.460574 |
| 38 | 1 | 0 | -1.574941  | 5.615438  | -2.219148 |
| 39 | 1 | 0 | -1.649819  | 4.246915  | -0.182802 |
| 40 | 6 | 0 | -1.973887  | 2.279545  | 2.570574  |
| 41 | 6 | 0 | -2.315952  | 2.965477  | 3.738501  |
| 42 | 6 | 0 | -3.424072  | 3.815320  | 3.786264  |
| 43 | 6 | 0 | -4.186779  | 3.953113  | 2.617392  |
| 44 | 6 | 0 | -3.849196  | 3.274744  | 1.450905  |
| 45 | 6 | 0 | -2.731233  | 2.425983  | 1.404935  |

|    |    |   |           |           |           |
|----|----|---|-----------|-----------|-----------|
| 46 | 1  | 0 | -1.109084 | 1.625462  | 2.579380  |
| 47 | 1  | 0 | -1.705668 | 2.831803  | 4.628185  |
| 48 | 1  | 0 | -5.060457 | 4.600106  | 2.620851  |
| 49 | 1  | 0 | -4.459158 | 3.411429  | 0.563229  |
| 50 | 6  | 0 | -3.780268 | 4.576212  | 5.040679  |
| 51 | 1  | 0 | -3.464163 | 5.624479  | 4.972662  |
| 52 | 1  | 0 | -4.861125 | 4.576977  | 5.214056  |
| 53 | 1  | 0 | -3.296676 | 4.144617  | 5.921332  |
| 54 | 6  | 0 | -2.423894 | 4.965616  | -4.741564 |
| 55 | 1  | 0 | -2.308047 | 4.360642  | -5.645662 |
| 56 | 1  | 0 | -3.364034 | 5.522237  | -4.841634 |
| 57 | 1  | 0 | -1.613220 | 5.699830  | -4.718124 |
| 58 | 1  | 0 | -3.337262 | 0.999595  | -2.434959 |
| 59 | 6  | 0 | 2.442906  | -1.627298 | 0.111788  |
| 60 | 6  | 0 | 3.401320  | -0.434901 | 0.066477  |
| 61 | 6  | 0 | 2.694717  | 0.763203  | 0.100230  |
| 62 | 6  | 0 | 5.137815  | 1.098910  | 0.050292  |
| 63 | 6  | 0 | 4.787989  | -0.256680 | 0.040420  |
| 64 | 16 | 0 | 3.718933  | 2.155957  | 0.100779  |
| 65 | 1  | 0 | 5.542843  | -1.034227 | 0.015448  |
| 66 | 6  | 0 | 9.927044  | 0.727129  | -0.093222 |
| 67 | 6  | 0 | 11.614554 | -2.590823 | -0.266002 |
| 68 | 6  | 0 | 10.266858 | -2.986082 | -0.251156 |

|    |   |   |           |           |           |
|----|---|---|-----------|-----------|-----------|
| 69 | 6 | 0 | 9.876278  | -4.316544 | -0.307242 |
| 70 | 6 | 0 | 10.872053 | -5.291946 | -0.381428 |
| 71 | 6 | 0 | 12.220180 | -4.915789 | -0.397568 |
| 72 | 6 | 0 | 12.608975 | -3.573549 | -0.340599 |
| 73 | 6 | 0 | 11.675901 | -1.105295 | -0.192106 |
| 74 | 6 | 0 | 10.299405 | -0.608926 | -0.142485 |
| 75 | 6 | 0 | 9.390030  | -1.792490 | -0.170651 |
| 76 | 1 | 0 | 8.820617  | -4.568380 | -0.293502 |
| 77 | 1 | 0 | 10.605151 | -6.343449 | -0.427314 |
| 78 | 1 | 0 | 12.988132 | -5.681135 | -0.455883 |
| 79 | 1 | 0 | 13.661249 | -3.327056 | -0.355979 |
| 80 | 1 | 0 | 10.719768 | 1.468530  | -0.093584 |
| 81 | 8 | 0 | 8.166799  | -1.827948 | -0.138776 |
| 82 | 6 | 0 | 12.855446 | -0.376826 | -0.170789 |
| 83 | 6 | 0 | 12.933015 | 1.047232  | -0.086512 |
| 84 | 7 | 0 | 13.055308 | 2.204500  | -0.017787 |
| 85 | 6 | 0 | 14.150541 | -0.978207 | -0.227287 |
| 86 | 7 | 0 | 15.227541 | -1.421334 | -0.271536 |
| 87 | 6 | 0 | 2.918503  | -2.791377 | -3.529687 |
| 88 | 6 | 0 | 2.426890  | -4.101608 | -3.506346 |
| 89 | 6 | 0 | 1.965036  | -4.598567 | -2.281415 |
| 90 | 6 | 0 | 2.000823  | -3.821829 | -1.124772 |
| 91 | 6 | 0 | 2.498443  | -2.511542 | -1.151535 |



|     |   |   |          |           |           |
|-----|---|---|----------|-----------|-----------|
| 92  | 6 | 0 | 2.952750 | -2.008671 | -2.376428 |
| 93  | 1 | 0 | 3.282045 | -2.372924 | -4.464903 |
| 94  | 1 | 0 | 1.574198 | -5.611759 | -2.228167 |
| 95  | 1 | 0 | 1.649655 | -4.246459 | -0.189676 |
| 96  | 6 | 0 | 1.974355 | -2.283617 | 2.566580  |
| 97  | 6 | 0 | 2.316770 | -2.971162 | 3.733457  |
| 98  | 6 | 0 | 3.425327 | -3.820508 | 3.779924  |
| 99  | 6 | 0 | 4.188094 | -3.956114 | 2.610838  |
| 100 | 6 | 0 | 3.850164 | -3.276131 | 1.445391  |
| 101 | 6 | 0 | 2.731765 | -2.427871 | 1.400715  |
| 102 | 1 | 0 | 1.109218 | -1.629988 | 2.576406  |
| 103 | 1 | 0 | 1.706414 | -2.839143 | 4.623339  |
| 104 | 1 | 0 | 5.062112 | -4.602653 | 2.613299  |
| 105 | 1 | 0 | 4.460215 | -3.411152 | 0.557520  |
| 106 | 6 | 0 | 3.781899 | -4.583133 | 5.033178  |
| 107 | 1 | 0 | 3.465628 | -5.631268 | 4.963878  |
| 108 | 1 | 0 | 4.862819 | -4.584266 | 5.206150  |
| 109 | 1 | 0 | 3.298684 | -4.152668 | 5.914592  |
| 110 | 6 | 0 | 2.422563 | -4.957998 | -4.749764 |
| 111 | 1 | 0 | 2.306050 | -4.351628 | -5.652843 |
| 112 | 1 | 0 | 3.362834 | -5.514149 | -4.851214 |
| 113 | 1 | 0 | 1.612136 | -5.692505 | -4.727063 |
| 114 | 1 | 0 | 3.336726 | -0.995679 | -2.437116 |

|     |   |   |           |           |           |
|-----|---|---|-----------|-----------|-----------|
| 115 | 6 | 0 | -0.186262 | -1.418265 | 0.124217  |
| 116 | 6 | 0 | 1.089377  | -0.881233 | 0.135962  |
| 117 | 6 | 0 | 1.274625  | 0.530187  | 0.128788  |
| 118 | 6 | 0 | 0.186454  | 1.418235  | 0.126199  |
| 119 | 1 | 0 | -0.342086 | -2.492136 | 0.100750  |
| 120 | 1 | 0 | 0.342283  | 2.492135  | 0.104229  |
| 121 | 6 | 0 | 8.691652  | 1.372562  | -0.044023 |
| 122 | 6 | 0 | 8.423959  | 2.767678  | -0.008004 |
| 123 | 6 | 0 | 6.993068  | 2.927822  | 0.035270  |
| 124 | 6 | 0 | 6.450177  | 1.613459  | 0.023830  |
| 125 | 6 | 0 | 8.651049  | 5.000124  | 0.030618  |
| 126 | 6 | 0 | 7.209525  | 5.160494  | 0.075292  |
| 127 | 7 | 0 | 6.371913  | 4.103945  | 0.076642  |
| 128 | 7 | 0 | 9.262287  | 3.806100  | -0.011528 |
| 129 | 7 | 0 | 8.952885  | 7.402712  | 0.072450  |
| 130 | 6 | 0 | 7.585274  | 7.538040  | 0.115075  |
| 131 | 6 | 0 | 6.703715  | 6.490806  | 0.118221  |
| 132 | 1 | 0 | 5.630384  | 6.642677  | 0.152636  |
| 133 | 6 | 0 | 9.450332  | 6.194359  | 0.032481  |
| 134 | 1 | 0 | 7.225655  | 8.562747  | 0.147462  |
| 135 | 1 | 0 | 10.532045 | 6.074921  | -0.000937 |
| 136 | 6 | 0 | -8.691528 | -1.372282 | -0.043318 |
| 137 | 6 | 0 | -8.423889 | -2.767421 | -0.007707 |

|     |   |   |            |           |           |
|-----|---|---|------------|-----------|-----------|
| 138 | 6 | 0 | -6.992987  | -2.927659 | 0.034895  |
| 139 | 6 | 0 | -6.450032  | -1.613327 | 0.023509  |
| 140 | 6 | 0 | -8.651090  | -4.999865 | 0.030563  |
| 141 | 6 | 0 | -7.209555  | -5.160327 | 0.074559  |
| 142 | 7 | 0 | -6.371882  | -4.103828 | 0.075748  |
| 143 | 7 | 0 | -9.262278  | -3.805795 | -0.011041 |
| 144 | 7 | 0 | -8.953046  | -7.402444 | 0.072008  |
| 145 | 6 | 0 | -7.585424  | -7.537860 | 0.114000  |
| 146 | 6 | 0 | -6.703803  | -6.490678 | 0.116978  |
| 147 | 1 | 0 | -5.630466  | -6.642619 | 0.150881  |
| 148 | 6 | 0 | -9.450440  | -6.194054 | 0.032518  |
| 149 | 1 | 0 | -7.225849  | -8.562595 | 0.146011  |
| 150 | 1 | 0 | -10.532160 | -6.074548 | -0.000409 |
| 151 | 8 | 0 | 7.470328   | 0.737332  | -0.022120 |
| 152 | 8 | 0 | -7.470152  | -0.737140 | -0.021965 |

-----

**Cartesian coordinates of Designed Molecule DL4**

-----

| Center | Atomic | Atomic Coordinates (Angstroms) |           |           |          |
|--------|--------|--------------------------------|-----------|-----------|----------|
| Number | Number | Type                           | X         | Y         | Z        |
| 1      | 6      | 0                              | -1.031723 | 1.020318  | 0.103613 |
| 2      | 6      | 0                              | -1.327945 | -0.369842 | 0.080865 |

|    |    |   |            |           |           |
|----|----|---|------------|-----------|-----------|
| 3  | 6  | 0 | -2.322438  | 1.871968  | 0.092930  |
| 4  | 6  | 0 | -3.373951  | 0.760092  | 0.050354  |
| 5  | 6  | 0 | -2.765662  | -0.488480 | 0.061278  |
| 6  | 6  | 0 | -5.251242  | -0.616906 | 0.040458  |
| 7  | 6  | 0 | -4.773835  | 0.695338  | 0.042913  |
| 8  | 16 | 0 | -3.910038  | -1.776833 | 0.057376  |
| 9  | 1  | 0 | -5.433547  | 1.554412  | 0.042942  |
| 10 | 6  | 0 | -10.710722 | -1.050889 | -0.059648 |
| 11 | 6  | 0 | -12.754826 | 2.064220  | -0.127868 |
| 12 | 6  | 0 | -11.449732 | 2.584580  | -0.053092 |
| 13 | 6  | 0 | -11.189715 | 3.947792  | -0.020907 |
| 14 | 6  | 0 | -12.274435 | 4.824998  | -0.064904 |
| 15 | 6  | 0 | -13.579763 | 4.323677  | -0.139355 |
| 16 | 6  | 0 | -13.838114 | 2.949969  | -0.171800 |
| 17 | 6  | 0 | -12.680676 | 0.578939  | -0.144779 |
| 18 | 6  | 0 | -11.265084 | 0.211307  | -0.074869 |
| 19 | 6  | 0 | -10.469752 | 1.473586  | -0.017491 |
| 20 | 1  | 0 | -10.164611 | 4.299542  | 0.036859  |
| 21 | 1  | 0 | -12.110237 | 5.897980  | -0.041630 |
| 22 | 1  | 0 | -14.416230 | 5.015062  | -0.173030 |
| 23 | 1  | 0 | -14.860694 | 2.603552  | -0.229535 |
| 24 | 1  | 0 | -11.374010 | -1.908596 | -0.103533 |
| 25 | 8  | 0 | -9.252604  | 1.599060  | 0.046671  |

|    |   |   |            |           |           |
|----|---|---|------------|-----------|-----------|
| 26 | 6 | 0 | -13.774744 | -0.265641 | -0.215607 |
| 27 | 6 | 0 | -13.680509 | -1.691321 | -0.232894 |
| 28 | 7 | 0 | -13.639685 | -2.855907 | -0.249417 |
| 29 | 6 | 0 | -15.125078 | 0.197411  | -0.280337 |
| 30 | 7 | 0 | -16.239829 | 0.532184  | -0.334432 |
| 31 | 6 | 0 | -2.731798  | 3.076210  | -3.544025 |
| 32 | 6 | 0 | -2.131884  | 4.340598  | -3.525029 |
| 33 | 6 | 0 | -1.618585  | 4.795659  | -2.304325 |
| 34 | 6 | 0 | -1.708397  | 4.023190  | -1.147798 |
| 35 | 6 | 0 | -2.315248  | 2.759490  | -1.169436 |
| 36 | 6 | 0 | -2.821705  | 2.298222  | -2.390400 |
| 37 | 1 | 0 | -3.136834  | 2.690066  | -4.476147 |
| 38 | 1 | 0 | -1.143047  | 5.772140  | -2.254479 |
| 39 | 1 | 0 | -1.312930  | 4.415713  | -0.216440 |
| 40 | 6 | 0 | -1.817326  | 2.439070  | 2.559452  |
| 41 | 6 | 0 | -2.096003  | 3.141065  | 3.734109  |
| 42 | 6 | 0 | -3.100595  | 4.111583  | 3.782245  |
| 43 | 6 | 0 | -3.825477  | 4.353393  | 2.606583  |
| 44 | 6 | 0 | -3.550383  | 3.657971  | 1.433142  |
| 45 | 6 | 0 | -2.536152  | 2.688067  | 1.386312  |
| 46 | 1 | 0 | -1.032211  | 1.691155  | 2.566767  |
| 47 | 1 | 0 | -1.517711  | 2.925447  | 4.629071  |
| 48 | 1 | 0 | -4.618068  | 5.097635  | 2.609443  |

|    |    |   |           |           |           |
|----|----|---|-----------|-----------|-----------|
| 49 | 1  | 0 | -4.124543 | 3.879577  | 0.538664  |
| 50 | 6  | 0 | -3.383897 | 4.890234  | 5.044333  |
| 51 | 1  | 0 | -2.932980 | 5.889485  | 5.004187  |
| 52 | 1  | 0 | -4.459176 | 5.028385  | 5.195811  |
| 53 | 1  | 0 | -2.980213 | 4.384112  | 5.925625  |
| 54 | 6  | 0 | -2.067124 | 5.195052  | -4.768119 |
| 55 | 1  | 0 | -2.005321 | 4.582199  | -5.672254 |
| 56 | 1  | 0 | -2.960415 | 5.824942  | -4.863193 |
| 57 | 1  | 0 | -1.200336 | 5.862260  | -4.750411 |
| 58 | 1  | 0 | -3.288896 | 1.320629  | -2.447829 |
| 59 | 6  | 0 | 2.291485  | -1.756513 | 0.039002  |
| 60 | 6  | 0 | 3.342839  | -0.643881 | 0.017450  |
| 61 | 6  | 0 | 2.734682  | 0.604056  | 0.060646  |
| 62 | 6  | 0 | 5.220141  | 0.733073  | 0.030785  |
| 63 | 6  | 0 | 4.742675  | -0.578893 | 0.004732  |
| 64 | 16 | 0 | 3.879103  | 1.892207  | 0.081459  |
| 65 | 1  | 0 | 5.402327  | -1.437694 | -0.018623 |
| 66 | 6  | 0 | 10.682758 | 0.921386  | -0.044737 |
| 67 | 6  | 0 | 12.618270 | -2.263006 | -0.063532 |
| 68 | 6  | 0 | 11.294249 | -2.737196 | -0.105317 |
| 69 | 6  | 0 | 10.986034 | -4.090289 | -0.139016 |
| 70 | 6  | 0 | 12.040276 | -5.004918 | -0.130493 |
| 71 | 6  | 0 | 13.363855 | -4.549761 | -0.089007 |

|    |   |   |           |           |           |
|----|---|---|-----------|-----------|-----------|
| 72 | 6 | 0 | 13.670788 | -3.186117 | -0.055339 |
| 73 | 6 | 0 | 12.596505 | -0.776197 | -0.035758 |
| 74 | 6 | 0 | 11.193136 | -0.359218 | -0.060702 |
| 75 | 6 | 0 | 10.353020 | -1.592633 | -0.106372 |
| 76 | 1 | 0 | 9.948087  | -4.405810 | -0.170874 |
| 77 | 1 | 0 | 11.838157 | -6.071355 | -0.156007 |
| 78 | 1 | 0 | 14.176289 | -5.269995 | -0.082686 |
| 79 | 1 | 0 | 14.706036 | -2.875831 | -0.023818 |
| 80 | 1 | 0 | 11.376418 | 1.755123  | -0.009279 |
| 81 | 8 | 0 | 9.130961  | -1.675292 | -0.138730 |
| 82 | 6 | 0 | 13.721041 | 0.029458  | 0.004944  |
| 83 | 6 | 0 | 13.677249 | 1.457484  | 0.028794  |
| 84 | 7 | 0 | 13.677689 | 2.622733  | 0.048614  |
| 85 | 6 | 0 | 15.055720 | -0.480597 | 0.026884  |
| 86 | 7 | 0 | 16.159225 | -0.854207 | 0.045946  |
| 87 | 6 | 0 | 2.682964  | -2.874770 | -3.627265 |
| 88 | 6 | 0 | 2.083024  | -4.139273 | -3.635118 |
| 89 | 6 | 0 | 1.575664  | -4.622963 | -2.422978 |
| 90 | 6 | 0 | 1.671214  | -3.877941 | -1.249026 |
| 91 | 6 | 0 | 2.278065  | -2.614075 | -1.243864 |
| 92 | 6 | 0 | 2.778584  | -2.124169 | -2.456098 |
| 93 | 1 | 0 | 3.083470  | -2.466770 | -4.552005 |
| 94 | 1 | 0 | 1.100289  | -5.600358 | -2.393815 |

|     |   |   |           |           |           |
|-----|---|---|-----------|-----------|-----------|
| 95  | 1 | 0 | 1.280276  | -4.292307 | -0.325248 |
| 96  | 6 | 0 | 1.798430  | -2.381483 | 2.493945  |
| 97  | 6 | 0 | 2.082796  | -3.110900 | 3.650382  |
| 98  | 6 | 0 | 3.087512  | -4.082278 | 3.670748  |
| 99  | 6 | 0 | 3.806600  | -4.296348 | 2.486190  |
| 100 | 6 | 0 | 3.525818  | -3.573528 | 1.330786  |
| 101 | 6 | 0 | 2.511464  | -2.602815 | 1.311750  |
| 102 | 1 | 0 | 1.013451  | -1.633942 | 2.522700  |
| 103 | 1 | 0 | 1.508932  | -2.916389 | 4.553000  |
| 104 | 1 | 0 | 4.599129  | -5.040429 | 2.467660  |
| 105 | 1 | 0 | 4.095569  | -3.774026 | 0.428543  |
| 106 | 6 | 0 | 3.376880  | -4.890407 | 4.912769  |
| 107 | 1 | 0 | 2.924803  | -5.888077 | 4.851751  |
| 108 | 1 | 0 | 4.452825  | -5.032931 | 5.055170  |
| 109 | 1 | 0 | 2.978410  | -4.404675 | 5.807804  |
| 110 | 6 | 0 | 2.012101  | -4.964170 | -4.897684 |
| 111 | 1 | 0 | 1.944310  | -4.330179 | -5.786694 |
| 112 | 1 | 0 | 2.905608  | -5.590397 | -5.012805 |
| 113 | 1 | 0 | 1.146249  | -5.632782 | -4.890774 |
| 114 | 1 | 0 | 3.245566  | -1.145478 | -2.492776 |
| 115 | 6 | 0 | -0.314445 | -1.340081 | 0.063153  |
| 116 | 6 | 0 | 1.000884  | -0.905422 | 0.076002  |
| 117 | 6 | 0 | 1.297072  | 0.484906  | 0.084445  |



|     |    |   |           |           |           |
|-----|----|---|-----------|-----------|-----------|
| 118 | 6  | 0 | 0.283556  | 1.455234  | 0.094501  |
| 119 | 1  | 0 | -0.555223 | -2.397940 | 0.030634  |
| 120 | 1  | 0 | 0.524231  | 2.513579  | 0.085642  |
| 121 | 6  | 0 | 9.147994  | 0.905379  | -0.170607 |
| 122 | 6  | 0 | 8.781240  | 2.193797  | -0.137887 |
| 123 | 6  | 0 | 7.206636  | 2.127529  | -0.108536 |
| 124 | 6  | 0 | 6.744832  | 0.869943  | -0.137090 |
| 125 | 16 | 0 | 7.945002  | -0.317393 | -0.184379 |
| 126 | 6  | 0 | 8.780773  | 4.769621  | -0.049896 |
| 127 | 6  | 0 | 7.208093  | 4.701223  | 0.042985  |
| 128 | 7  | 0 | 6.688710  | 3.534466  | -0.003200 |
| 129 | 7  | 0 | 9.355847  | 3.626992  | -0.151778 |
| 130 | 6  | 0 | 7.255990  | 7.277836  | -0.047045 |
| 131 | 6  | 0 | 6.593382  | 6.110334  | -0.036867 |
| 132 | 1  | 0 | 5.496078  | 6.110274  | -0.040593 |
| 133 | 6  | 0 | 9.366875  | 6.231330  | -0.027410 |
| 134 | 1  | 0 | 6.702107  | 8.193248  | -0.058632 |
| 135 | 1  | 0 | 10.433459 | 6.310571  | 0.004517  |
| 136 | 6  | 0 | -9.176848 | -0.990796 | 0.063713  |
| 137 | 6  | 0 | -8.708154 | -2.246139 | 0.057225  |
| 138 | 6  | 0 | -7.143585 | -2.054836 | 0.069715  |
| 139 | 6  | 0 | -6.783921 | -0.764006 | 0.069724  |
| 140 | 16 | 0 | -8.075445 | 0.324285  | 0.068782  |

|     |   |   |            |           |           |
|-----|---|---|------------|-----------|-----------|
| 141 | 6 | 0 | -8.501172  | -4.815075 | 0.075496  |
| 142 | 6 | 0 | -6.937803  | -4.623457 | 0.151569  |
| 143 | 7 | 0 | -6.513756  | -3.418066 | 0.130816  |
| 144 | 7 | 0 | -9.166848  | -3.719879 | 0.011375  |
| 145 | 6 | 0 | -6.781447  | -7.192419 | -0.007552 |
| 146 | 6 | 0 | -6.213918  | -5.976289 | 0.026358  |
| 147 | 1 | 0 | -5.120268  | -5.888302 | 0.009645  |
| 148 | 6 | 0 | -8.968542  | -6.319095 | 0.065371  |
| 149 | 1 | 0 | -6.156586  | -8.059948 | -0.050453 |
| 150 | 1 | 0 | -10.024868 | -6.484256 | 0.107767  |
| 151 | 6 | 0 | 8.725151   | 7.327280  | -0.042635 |
| 152 | 6 | 0 | -8.241790  | -7.359396 | 0.012911  |
| 153 | 1 | 0 | 9.241657   | 8.264315  | -0.052028 |
| 154 | 1 | 0 | -8.682053  | -8.334204 | -0.015711 |

-----

**Cartesian coordinates of Designed Molecule DL5**

-----

| Center | Atomic | Atomic | Coordinates (Angstroms) |   |   |
|--------|--------|--------|-------------------------|---|---|
| Number | Number | Type   | X                       | Y | Z |

-----

|   |   |   |           |           |          |
|---|---|---|-----------|-----------|----------|
| 1 | 6 | 0 | -0.985329 | 1.094957  | 0.148227 |
| 2 | 6 | 0 | -1.299041 | -0.291524 | 0.156284 |
| 3 | 6 | 0 | -2.264960 | 1.962221  | 0.106194 |

|    |    |   |            |           |           |
|----|----|---|------------|-----------|-----------|
| 4  | 6  | 0 | -3.330169  | 0.862915  | 0.081356  |
| 5  | 6  | 0 | -2.737944  | -0.392562 | 0.127353  |
| 6  | 6  | 0 | -5.224705  | -0.490275 | 0.088537  |
| 7  | 6  | 0 | -4.730656  | 0.815559  | 0.063596  |
| 8  | 16 | 0 | -3.898570  | -1.666185 | 0.144618  |
| 9  | 1  | 0 | -5.379349  | 1.682589  | 0.037445  |
| 10 | 6  | 0 | -9.818485  | -0.614636 | -0.068786 |
| 11 | 6  | 0 | -11.536999 | 2.691593  | -0.118540 |
| 12 | 6  | 0 | -10.187230 | 3.076504  | -0.020564 |
| 13 | 6  | 0 | -9.791562  | 4.405972  | 0.033807  |
| 14 | 6  | 0 | -10.781619 | 5.388724  | -0.011210 |
| 15 | 6  | 0 | -12.129707 | 5.022772  | -0.108599 |
| 16 | 6  | 0 | -12.524773 | 3.682699  | -0.163355 |
| 17 | 6  | 0 | -11.612748 | 1.206750  | -0.155257 |
| 18 | 6  | 0 | -10.242512 | 0.697183  | -0.073179 |
| 19 | 6  | 0 | -9.324825  | 1.871861  | 0.011518  |
| 20 | 1  | 0 | -8.737097  | 4.651639  | 0.109002  |
| 21 | 1  | 0 | -10.510413 | 6.439258  | 0.029033  |
| 22 | 1  | 0 | -12.891675 | 5.795467  | -0.142852 |
| 23 | 1  | 0 | -13.576189 | 3.442081  | -0.238413 |
| 24 | 1  | 0 | -10.564209 | -1.400349 | -0.132735 |
| 25 | 8  | 0 | -8.102211  | 1.872953  | 0.092299  |
| 26 | 6  | 0 | -12.785328 | 0.477941  | -0.251227 |

|    |   |   |            |           |           |
|----|---|---|------------|-----------|-----------|
| 27 | 6 | 0 | -12.835081 | -0.949634 | -0.287242 |
| 28 | 7 | 0 | -12.911656 | -2.112086 | -0.319506 |
| 29 | 6 | 0 | -14.081094 | 1.075777  | -0.325997 |
| 30 | 7 | 0 | -15.155578 | 1.522074  | -0.389042 |
| 31 | 6 | 0 | -2.629190  | 3.083622  | -3.561913 |
| 32 | 6 | 0 | -2.013394  | 4.340480  | -3.568132 |
| 33 | 6 | 0 | -1.504339  | 4.818315  | -2.354373 |
| 34 | 6 | 0 | -1.613439  | 4.075091  | -1.180472 |
| 35 | 6 | 0 | -2.236142  | 2.818944  | -1.176970 |
| 36 | 6 | 0 | -2.738432  | 2.334812  | -2.390782 |
| 37 | 1 | 0 | -3.031477  | 2.680266  | -4.487916 |
| 38 | 1 | 0 | -1.016824  | 5.789673  | -2.323908 |
| 39 | 1 | 0 | -1.220633  | 4.484925  | -0.255466 |
| 40 | 6 | 0 | -1.772851  | 2.582142  | 2.562615  |
| 41 | 6 | 0 | -2.052160  | 3.315643  | 3.717708  |
| 42 | 6 | 0 | -3.044666  | 4.299559  | 3.734053  |
| 43 | 6 | 0 | -3.756772  | 4.522074  | 2.546829  |
| 44 | 6 | 0 | -3.480971  | 3.795218  | 1.392763  |
| 45 | 6 | 0 | -2.478830  | 2.811827  | 1.377791  |
| 46 | 1 | 0 | -0.997414  | 1.824834  | 2.594507  |
| 47 | 1 | 0 | -1.483999  | 3.114391  | 4.622451  |
| 48 | 1 | 0 | -4.539814  | 5.276049  | 2.525132  |
| 49 | 1 | 0 | -4.044928  | 4.002414  | 0.488395  |

|    |    |   |           |           |           |
|----|----|---|-----------|-----------|-----------|
| 50 | 6  | 0 | -3.328338 | 5.111849  | 4.974673  |
| 51 | 1  | 0 | -2.864414 | 6.104112  | 4.914421  |
| 52 | 1  | 0 | -4.402973 | 5.267079  | 5.113671  |
| 53 | 1  | 0 | -2.938355 | 4.622062  | 5.871231  |
| 54 | 6  | 0 | -1.927591 | 5.163890  | -4.830745 |
| 55 | 1  | 0 | -1.866209 | 4.528727  | -5.719379 |
| 56 | 1  | 0 | -2.811977 | 5.802460  | -4.948458 |
| 57 | 1  | 0 | -1.052547 | 5.820409  | -4.821679 |
| 58 | 1  | 0 | -3.217554 | 1.362055  | -2.428730 |
| 59 | 6  | 0 | 2.302652  | -1.724075 | 0.178359  |
| 60 | 6  | 0 | 3.368236  | -0.625555 | 0.139070  |
| 61 | 6  | 0 | 2.775693  | 0.630588  | 0.147192  |
| 62 | 6  | 0 | 5.262754  | 0.727674  | 0.135328  |
| 63 | 6  | 0 | 4.768843  | -0.578449 | 0.136671  |
| 64 | 16 | 0 | 3.936222  | 1.904415  | 0.146838  |
| 65 | 1  | 0 | 5.417671  | -1.445768 | 0.139496  |
| 66 | 6  | 0 | 9.903911  | 0.404316  | -0.039517 |
| 67 | 6  | 0 | 10.938723 | -3.174419 | -0.132920 |
| 68 | 6  | 0 | 9.538483  | -3.287439 | -0.054246 |
| 69 | 6  | 0 | 8.888296  | -4.513623 | -0.027385 |
| 70 | 6  | 0 | 9.666098  | -5.671291 | -0.080964 |
| 71 | 6  | 0 | 11.060953 | -5.576534 | -0.159404 |
| 72 | 6  | 0 | 11.712640 | -4.339830 | -0.186466 |

|    |   |   |           |           |           |
|----|---|---|-----------|-----------|-----------|
| 73 | 6 | 0 | 11.305625 | -1.733191 | -0.142274 |
| 74 | 6 | 0 | 10.061532 | -0.965085 | -0.063609 |
| 75 | 6 | 0 | 8.929651  | -1.937194 | -0.008440 |
| 76 | 1 | 0 | 7.805248  | -4.547948 | 0.033719  |
| 77 | 1 | 0 | 9.192994  | -6.648331 | -0.062078 |
| 78 | 1 | 0 | 11.656342 | -6.483531 | -0.200539 |
| 79 | 1 | 0 | 12.791704 | -4.309857 | -0.247549 |
| 80 | 1 | 0 | 10.790408 | 1.028670  | -0.082492 |
| 81 | 8 | 0 | 7.729814  | -1.698735 | 0.061099  |
| 82 | 6 | 0 | 12.599798 | -1.248187 | -0.214417 |
| 83 | 6 | 0 | 12.929935 | 0.142013  | -0.224351 |
| 84 | 7 | 0 | 13.234152 | 1.266973  | -0.235048 |
| 85 | 6 | 0 | 13.753422 | -2.088269 | -0.288047 |
| 86 | 7 | 0 | 14.719781 | -2.736400 | -0.349260 |
| 87 | 6 | 0 | 2.709822  | -2.935065 | -3.456608 |
| 88 | 6 | 0 | 2.093906  | -4.191769 | -3.439247 |
| 89 | 6 | 0 | 1.570530  | -4.639747 | -2.220212 |
| 90 | 6 | 0 | 1.665960  | -3.867944 | -1.063681 |
| 91 | 6 | 0 | 2.288800  | -2.612028 | -1.083658 |
| 92 | 6 | 0 | 2.805415  | -2.157753 | -2.302994 |
| 93 | 1 | 0 | 3.123042  | -2.554493 | -4.387430 |
| 94 | 1 | 0 | 1.082520  | -5.610119 | -2.171671 |
| 95 | 1 | 0 | 1.262234  | -4.255023 | -0.133588 |

|     |   |   |           |           |           |
|-----|---|---|-----------|-----------|-----------|
| 96  | 6 | 0 | 1.781616  | -2.283550 | 2.643302  |
| 97  | 6 | 0 | 2.047201  | -2.988433 | 3.819256  |
| 98  | 6 | 0 | 3.039261  | -3.971560 | 3.871412  |
| 99  | 6 | 0 | 3.765226  | -4.223077 | 2.698465  |
| 100 | 6 | 0 | 3.503133  | -3.524810 | 1.523733  |
| 101 | 6 | 0 | 2.501416  | -2.542193 | 1.472840  |
| 102 | 1 | 0 | 1.006016  | -1.525750 | 2.647479  |
| 103 | 1 | 0 | 1.468499  | -2.765074 | 4.712053  |
| 104 | 1 | 0 | 4.548337  | -4.977268 | 2.704492  |
| 105 | 1 | 0 | 4.077643  | -3.754092 | 0.631417  |
| 106 | 6 | 0 | 3.308144  | -4.753129 | 5.134850  |
| 107 | 1 | 0 | 2.843909  | -5.746232 | 5.093923  |
| 108 | 1 | 0 | 4.380986  | -4.905664 | 5.289745  |
| 109 | 1 | 0 | 2.908589  | -4.241039 | 6.014577  |
| 110 | 6 | 0 | 2.022808  | -5.045858 | -4.682241 |
| 111 | 1 | 0 | 1.970371  | -4.432647 | -5.586731 |
| 112 | 1 | 0 | 2.909176  | -5.685829 | -4.774742 |
| 113 | 1 | 0 | 1.148481  | -5.703201 | -4.666656 |
| 114 | 1 | 0 | 3.285112  | -1.186161 | -2.359151 |
| 115 | 6 | 0 | -0.297872 | -1.274540 | 0.170422  |
| 116 | 6 | 0 | 1.022739  | -0.856224 | 0.184008  |
| 117 | 6 | 0 | 1.336535  | 0.530080  | 0.161645  |
| 118 | 6 | 0 | 0.335414  | 1.513002  | 0.139852  |

|     |    |   |           |           |           |
|-----|----|---|-----------|-----------|-----------|
| 119 | 1  | 0 | -0.551832 | -2.329773 | 0.161220  |
| 120 | 1  | 0 | 0.589616  | 2.567726  | 0.107677  |
| 121 | 6  | 0 | 8.910365  | 1.579693  | 0.014841  |
| 122 | 6  | 0 | 8.458453  | 2.880339  | 0.043960  |
| 123 | 6  | 0 | 6.994987  | 3.074613  | 0.046340  |
| 124 | 6  | 0 | 6.470024  | 1.679916  | 0.049690  |
| 125 | 16 | 0 | 7.643096  | 0.488743  | 0.012980  |
| 126 | 6  | 0 | -6.267456 | -1.623054 | 0.055633  |
| 127 | 6  | 0 | -6.743017 | -2.917222 | 0.085627  |
| 128 | 6  | 0 | -8.151455 | -2.891563 | 0.030496  |
| 129 | 6  | 0 | -8.707723 | -1.680794 | -0.035400 |
| 130 | 16 | 0 | -7.512919 | -0.510848 | -0.033626 |
| 131 | 6  | 0 | -7.317070 | -5.272463 | 0.016702  |
| 132 | 6  | 0 | -6.284927 | -4.381993 | 0.212908  |
| 133 | 16 | 0 | -8.827759 | -4.569227 | 0.094951  |
| 134 | 1  | 0 | -5.223188 | -4.635043 | 0.209808  |
| 135 | 6  | 0 | -7.163340 | -6.782699 | -0.242436 |
| 136 | 8  | 0 | -8.020320 | -7.645866 | -0.427077 |
| 137 | 8  | 0 | -5.863595 | -7.172245 | -0.260488 |
| 138 | 6  | 0 | -5.762760 | -8.577867 | -0.503302 |
| 139 | 1  | 0 | -4.862465 | -8.952261 | -0.062622 |
| 140 | 1  | 0 | -6.605372 | -9.075850 | -0.070960 |
| 141 | 1  | 0 | -5.744994 | -8.757250 | -1.558008 |



|     |    |   |          |          |           |
|-----|----|---|----------|----------|-----------|
| 142 | 6  | 0 | 6.636729 | 4.559926 | -0.146268 |
| 143 | 6  | 0 | 7.738010 | 5.476307 | -0.196263 |
| 144 | 16 | 0 | 9.126048 | 4.543806 | -0.207624 |
| 145 | 1  | 0 | 5.611784 | 4.934972 | -0.132765 |
| 146 | 6  | 0 | 7.768258 | 7.015827 | -0.219997 |
| 147 | 8  | 0 | 8.724545 | 7.788627 | -0.263072 |
| 148 | 8  | 0 | 6.523757 | 7.555752 | -0.186695 |
| 149 | 6  | 0 | 6.593894 | 8.983840 | -0.210096 |
| 150 | 1  | 0 | 5.735921 | 9.391196 | 0.282694  |
| 151 | 1  | 0 | 7.481093 | 9.305673 | 0.294088  |
| 152 | 1  | 0 | 6.617149 | 9.323218 | -1.224582 |

-----

**Cartesian coordinates of Designed Molecule DL6**

-----

| Center | Atomic | Atomic | Coordinates (Angstroms) |   |   |
|--------|--------|--------|-------------------------|---|---|
| Number | Number | Type   | X                       | Y | Z |

-----

|   |   |   |           |           |          |
|---|---|---|-----------|-----------|----------|
| 1 | 6 | 0 | -1.028379 | 0.946889  | 0.113072 |
| 2 | 6 | 0 | -1.315201 | -0.444690 | 0.085411 |
| 3 | 6 | 0 | -2.326716 | 1.787414  | 0.091061 |
| 4 | 6 | 0 | -3.366408 | 0.664884  | 0.037629 |
| 5 | 6 | 0 | -2.753528 | -0.575866 | 0.053779 |
| 6 | 6 | 0 | -5.235643 | -0.729010 | 0.012082 |

|    |    |   |            |           |           |
|----|----|---|------------|-----------|-----------|
| 7  | 6  | 0 | -4.766437  | 0.585001  | 0.016535  |
| 8  | 16 | 0 | -3.883872  | -1.883025 | 0.040323  |
| 9  | 1  | 0 | -5.431788  | 1.440271  | 0.011799  |
| 10 | 6  | 0 | -10.506995 | -1.047757 | -0.108095 |
| 11 | 6  | 0 | -13.317931 | 1.388031  | -0.304597 |
| 12 | 6  | 0 | -12.208062 | 2.248600  | -0.384835 |
| 13 | 6  | 0 | -12.335582 | 3.623107  | -0.518810 |
| 14 | 6  | 0 | -13.623215 | 4.161421  | -0.575281 |
| 15 | 6  | 0 | -14.738189 | 3.320158  | -0.495927 |
| 16 | 6  | 0 | -14.604763 | 1.933923  | -0.359775 |
| 17 | 6  | 0 | -12.825741 | -0.012037 | -0.166447 |
| 18 | 6  | 0 | -11.367133 | 0.037880  | -0.181314 |
| 19 | 6  | 0 | -10.961818 | 1.450524  | -0.305320 |
| 20 | 1  | 0 | -11.447582 | 4.244393  | -0.576967 |
| 21 | 1  | 0 | -13.762697 | 5.233016  | -0.680517 |
| 22 | 1  | 0 | -15.735050 | 3.748146  | -0.540505 |
| 23 | 1  | 0 | -15.492416 | 1.319539  | -0.301927 |
| 24 | 1  | 0 | -10.974596 | -2.023052 | -0.051830 |
| 25 | 8  | 0 | -9.820435  | 1.901766  | -0.346748 |
| 26 | 6  | 0 | -13.648023 | -1.121857 | -0.039533 |
| 27 | 6  | 0 | -13.175904 | -2.460349 | 0.122543  |
| 28 | 7  | 0 | -12.843493 | -3.569327 | 0.262259  |
| 29 | 6  | 0 | -15.074566 | -1.049563 | -0.040762 |

|    |   |   |            |           |           |
|----|---|---|------------|-----------|-----------|
| 30 | 7 | 0 | -16.240112 | -1.036026 | -0.037443 |
| 31 | 6 | 0 | -2.721856  | 2.990265  | -3.547593 |
| 32 | 6 | 0 | -2.139115  | 4.262517  | -3.523304 |
| 33 | 6 | 0 | -1.640036  | 4.722847  | -2.298817 |
| 34 | 6 | 0 | -1.727260  | 3.947703  | -1.143774 |
| 35 | 6 | 0 | -2.317331  | 2.676147  | -1.170185 |
| 36 | 6 | 0 | -2.809750  | 2.210268  | -2.395237 |
| 37 | 1 | 0 | -3.115913  | 2.599947  | -4.482768 |
| 38 | 1 | 0 | -1.178295  | 5.705904  | -2.244922 |
| 39 | 1 | 0 | -1.343071  | 4.343716  | -0.209111 |
| 40 | 6 | 0 | -1.843914  | 2.367794  | 2.559207  |
| 41 | 6 | 0 | -2.140687  | 3.067233  | 3.731063  |
| 42 | 6 | 0 | -3.160853  | 4.021644  | 3.771821  |
| 43 | 6 | 0 | -3.882245  | 4.250179  | 2.591450  |
| 44 | 6 | 0 | -3.589038  | 3.556993  | 1.421052  |
| 45 | 6 | 0 | -2.559963  | 2.602440  | 1.381308  |
| 46 | 1 | 0 | -1.047149  | 1.632477  | 2.571150  |
| 47 | 1 | 0 | -1.564636  | 2.861894  | 4.630063  |
| 48 | 1 | 0 | -4.687062  | 4.981325  | 2.588435  |
| 49 | 1 | 0 | -4.161917  | 3.766884  | 0.522914  |
| 50 | 6 | 0 | -3.464728  | 4.797034  | 5.031354  |
| 51 | 1 | 0 | -3.030884  | 5.804043  | 4.993651  |
| 52 | 1 | 0 | -4.543111  | 4.917004  | 5.176581  |

|    |    |   |           |           |           |
|----|----|---|-----------|-----------|-----------|
| 53 | 1  | 0 | -3.057984 | 4.298491  | 5.915694  |
| 54 | 6  | 0 | -2.078919 | 5.119505  | -4.765060 |
| 55 | 1  | 0 | -2.001494 | 4.508747  | -5.669499 |
| 56 | 1  | 0 | -2.980855 | 5.736095  | -4.866240 |
| 57 | 1  | 0 | -1.222339 | 5.799826  | -4.741034 |
| 58 | 1  | 0 | -3.264931 | 1.227283  | -2.454877 |
| 59 | 6  | 0 | 2.319302  | -1.797604 | 0.064230  |
| 60 | 6  | 0 | 3.359497  | -0.674313 | 0.056682  |
| 61 | 6  | 0 | 2.746101  | 0.565226  | 0.102094  |
| 62 | 6  | 0 | 5.231058  | 0.718265  | 0.096327  |
| 63 | 6  | 0 | 4.760179  | -0.594719 | 0.056224  |
| 64 | 16 | 0 | 3.877716  | 1.870601  | 0.147116  |
| 65 | 1  | 0 | 5.424965  | -1.449985 | 0.033682  |
| 66 | 6  | 0 | 10.502862 | 1.033250  | -0.018885 |
| 67 | 6  | 0 | 13.340601 | -1.364394 | -0.299203 |
| 68 | 6  | 0 | 12.244227 | -2.244916 | -0.318324 |
| 69 | 6  | 0 | 12.392382 | -3.620037 | -0.419658 |
| 70 | 6  | 0 | 13.687197 | -4.137142 | -0.504857 |
| 71 | 6  | 0 | 14.788959 | -3.275074 | -0.486004 |
| 72 | 6  | 0 | 14.634754 | -1.888257 | -0.383753 |
| 73 | 6  | 0 | 12.829607 | 0.030081  | -0.186481 |
| 74 | 6  | 0 | 11.372236 | -0.043015 | -0.133425 |
| 75 | 6  | 0 | 10.987638 | -1.465576 | -0.216967 |

|    |   |   |           |           |           |
|----|---|---|-----------|-----------|-----------|
| 76 | 1 | 0 | 11.514455 | -4.257960 | -0.431078 |
| 77 | 1 | 0 | 13.842726 | -5.208610 | -0.585596 |
| 78 | 1 | 0 | 15.791383 | -3.686940 | -0.552064 |
| 79 | 1 | 0 | 15.512110 | -1.256255 | -0.372162 |
| 80 | 1 | 0 | 10.966456 | 2.009629  | 0.043723  |
| 81 | 8 | 0 | 9.855107  | -1.940666 | -0.204802 |
| 82 | 6 | 0 | 13.641246 | 1.154136  | -0.150621 |
| 83 | 6 | 0 | 13.160253 | 2.495403  | -0.051876 |
| 84 | 7 | 0 | 12.821472 | 3.608428  | 0.026746  |
| 85 | 6 | 0 | 15.066882 | 1.093635  | -0.212721 |
| 86 | 7 | 0 | 16.231478 | 1.082545  | -0.260868 |
| 87 | 6 | 0 | 2.756322  | -2.891919 | -3.603745 |
| 88 | 6 | 0 | 2.170415  | -4.162782 | -3.624686 |
| 89 | 6 | 0 | 1.655910  | -4.658471 | -2.420570 |
| 90 | 6 | 0 | 1.731202  | -3.918627 | -1.241797 |
| 91 | 6 | 0 | 2.324219  | -2.648314 | -1.222922 |
| 92 | 6 | 0 | 2.832306  | -2.147118 | -2.427482 |
| 93 | 1 | 0 | 3.162232  | -2.474701 | -4.522090 |
| 94 | 1 | 0 | 1.191165  | -5.641391 | -2.401776 |
| 95 | 1 | 0 | 1.334900  | -4.341523 | -0.324126 |
| 96 | 6 | 0 | 1.811242  | -2.447524 | 2.509686  |
| 97 | 6 | 0 | 2.095253  | -3.180743 | 3.663898  |
| 98 | 6 | 0 | 3.112612  | -4.138756 | 3.687061  |

|     |   |   |           |           |           |
|-----|---|---|-----------|-----------|-----------|
| 99  | 6 | 0 | 3.844395  | -4.335816 | 2.507441  |
| 100 | 6 | 0 | 3.563946  | -3.608830 | 1.354528  |
| 101 | 6 | 0 | 2.537782  | -2.650593 | 1.332362  |
| 102 | 1 | 0 | 1.016456  | -1.710397 | 2.535091  |
| 103 | 1 | 0 | 1.511397  | -2.999322 | 4.563007  |
| 104 | 1 | 0 | 4.647324  | -5.068863 | 2.491168  |
| 105 | 1 | 0 | 4.144570  | -3.794745 | 0.456099  |
| 106 | 6 | 0 | 3.402810  | -4.950247 | 4.926928  |
| 107 | 1 | 0 | 2.965850  | -5.954212 | 4.857328  |
| 108 | 1 | 0 | 4.479466  | -5.078172 | 5.078011  |
| 109 | 1 | 0 | 2.990100  | -4.475151 | 5.821356  |
| 110 | 6 | 0 | 2.122474  | -4.981780 | -4.892353 |
| 111 | 1 | 0 | 2.055239  | -4.343917 | -5.778719 |
| 112 | 1 | 0 | 3.024741  | -5.596328 | -5.002606 |
| 113 | 1 | 0 | 1.264904  | -5.661228 | -4.897839 |
| 114 | 1 | 0 | 3.290340  | -1.163949 | -2.452082 |
| 115 | 6 | 0 | -0.291274 | -1.404074 | 0.072125  |
| 116 | 6 | 0 | 1.020533  | -0.958048 | 0.096474  |
| 117 | 6 | 0 | 1.307464  | 0.433654  | 0.113106  |
| 118 | 6 | 0 | 0.283601  | 1.393167  | 0.116831  |
| 119 | 1 | 0 | -0.522082 | -2.464047 | 0.033184  |
| 120 | 1 | 0 | 0.514636  | 2.453798  | 0.112359  |
| 121 | 6 | 0 | 9.105802  | 1.163864  | 0.033706  |

|     |    |   |           |           |           |
|-----|----|---|-----------|-----------|-----------|
| 122 | 6  | 0 | 8.516094  | 2.458786  | 0.152244  |
| 123 | 6  | 0 | 7.109081  | 2.430735  | 0.177037  |
| 124 | 6  | 0 | 6.604639  | 1.125360  | 0.087124  |
| 125 | 16 | 0 | 7.863480  | -0.079305 | -0.044372 |
| 126 | 6  | 0 | -6.608396 | -1.136507 | -0.014621 |
| 127 | 6  | 0 | -7.112438 | -2.445108 | 0.023215  |
| 128 | 6  | 0 | -8.517476 | -2.474994 | -0.026913 |
| 129 | 6  | 0 | -9.109153 | -1.180238 | -0.090214 |
| 130 | 16 | 0 | -7.869255 | 0.069053  | -0.120927 |
| 131 | 6  | 0 | -9.156494 | -4.891588 | 0.265048  |
| 132 | 6  | 0 | -7.768055 | -5.508579 | 0.586189  |
| 133 | 6  | 0 | -6.384278 | -4.817934 | 0.437625  |
| 134 | 1  | 0 | -9.809919 | -5.045021 | 1.127913  |
| 135 | 1  | 0 | -7.820852 | -5.856853 | 1.620717  |
| 136 | 1  | 0 | -5.798938 | -5.377798 | -0.295324 |
| 137 | 8  | 0 | -6.215812 | -3.458900 | 0.030606  |
| 138 | 8  | 0 | -9.347891 | -3.520454 | -0.090114 |
| 139 | 6  | 0 | 6.367746  | 4.840422  | 0.401738  |
| 140 | 6  | 0 | 7.745693  | 5.559546  | 0.414559  |
| 141 | 6  | 0 | 9.147967  | 4.900328  | 0.337632  |
| 142 | 1  | 0 | 5.778646  | 5.254777  | -0.421076 |
| 143 | 1  | 0 | 7.712926  | 6.279254  | -0.407368 |
| 144 | 1  | 0 | 9.714721  | 5.183131  | 1.227753  |

|     |   |   |           |           |           |
|-----|---|---|-----------|-----------|-----------|
| 145 | 8 | 0 | 9.361039  | 3.492023  | 0.225841  |
| 146 | 8 | 0 | 6.200018  | 3.428213  | 0.274074  |
| 147 | 1 | 0 | 9.682610  | 5.317044  | -0.518986 |
| 148 | 1 | 0 | 7.754127  | 6.161083  | 1.327129  |
| 149 | 1 | 0 | 5.842858  | 5.094018  | 1.327206  |
| 150 | 1 | 0 | -5.860788 | -4.901811 | 1.395561  |
| 151 | 1 | 0 | -7.707006 | -6.414649 | -0.022571 |
| 152 | 1 | 0 | -9.604632 | -5.436188 | -0.568270 |

-----

**Cartesian coordinates of Designed Molecule DL7**

-----

| Center | Atomic | Atomic | Coordinates (Angstroms) |   |   |
|--------|--------|--------|-------------------------|---|---|
| Number | Number | Type   | X                       | Y | Z |

-----

|   |    |   |           |           |          |
|---|----|---|-----------|-----------|----------|
| 1 | 6  | 0 | -1.021705 | 0.949290  | 0.089792 |
| 2 | 6  | 0 | -1.311281 | -0.441507 | 0.064626 |
| 3 | 6  | 0 | -2.316069 | 1.793175  | 0.077890 |
| 4 | 6  | 0 | -3.358686 | 0.671667  | 0.035618 |
| 5 | 6  | 0 | -2.751242 | -0.571081 | 0.046404 |
| 6 | 6  | 0 | -5.228686 | -0.703094 | 0.016271 |
| 7 | 6  | 0 | -4.759587 | 0.602991  | 0.025871 |
| 8 | 16 | 0 | -3.889478 | -1.871181 | 0.041487 |
| 9 | 1  | 0 | -5.423416 | 1.460109  | 0.019906 |



|    |   |   |            |           |           |
|----|---|---|------------|-----------|-----------|
| 10 | 6 | 0 | -10.511901 | -1.159781 | 0.014176  |
| 11 | 6 | 0 | -13.493489 | 1.048293  | -0.230315 |
| 12 | 6 | 0 | -12.457784 | 1.993169  | -0.356741 |
| 13 | 6 | 0 | -12.708745 | 3.345770  | -0.535143 |
| 14 | 6 | 0 | -14.039835 | 3.767393  | -0.590874 |
| 15 | 6 | 0 | -15.078779 | 2.838707  | -0.466421 |
| 16 | 6 | 0 | -14.824452 | 1.474490  | -0.284135 |
| 17 | 6 | 0 | -12.890873 | -0.297553 | -0.049209 |
| 18 | 6 | 0 | -11.442630 | -0.144706 | -0.081832 |
| 19 | 6 | 0 | -11.152984 | 1.294417  | -0.268509 |
| 20 | 1 | 0 | -11.883311 | 4.044333  | -0.629264 |
| 21 | 1 | 0 | -14.271402 | 4.818986  | -0.730606 |
| 22 | 1 | 0 | -16.108437 | 3.180229  | -0.510637 |
| 23 | 1 | 0 | -15.650257 | 0.782332  | -0.189957 |
| 24 | 1 | 0 | -10.904264 | -2.169684 | 0.122441  |
| 25 | 8 | 0 | -10.052984 | 1.834210  | -0.324623 |
| 26 | 6 | 0 | -13.606282 | -1.467409 | 0.124743  |
| 27 | 6 | 0 | -12.966825 | -2.728906 | 0.318593  |
| 28 | 7 | 0 | -12.476863 | -3.773245 | 0.484913  |
| 29 | 6 | 0 | -15.031829 | -1.507342 | 0.136417  |
| 30 | 7 | 0 | -16.194768 | -1.579000 | 0.150555  |
| 31 | 6 | 0 | -2.737830  | 2.990626  | -3.559729 |
| 32 | 6 | 0 | -2.152636  | 4.261770  | -3.542416 |

|    |   |   |           |          |           |
|----|---|---|-----------|----------|-----------|
| 33 | 6 | 0 | -1.644096 | 4.723898 | -2.322465 |
| 34 | 6 | 0 | -1.724046 | 3.950938 | -1.165444 |
| 35 | 6 | 0 | -2.315193 | 2.679681 | -1.185158 |
| 36 | 6 | 0 | -2.818283 | 2.212677 | -2.405315 |
| 37 | 1 | 0 | -3.139454 | 2.599184 | -4.491293 |
| 38 | 1 | 0 | -1.180738 | 5.706472 | -2.273583 |
| 39 | 1 | 0 | -1.333293 | 4.348672 | -0.234250 |
| 40 | 6 | 0 | -1.808915 | 2.381372 | 2.539924  |
| 41 | 6 | 0 | -2.093063 | 3.085921 | 3.711919  |
| 42 | 6 | 0 | -3.110283 | 4.043062 | 3.758512  |
| 43 | 6 | 0 | -3.842240 | 4.268704 | 2.584152  |
| 44 | 6 | 0 | -3.562200 | 3.569936 | 1.413911  |
| 45 | 6 | 0 | -2.535551 | 2.612941 | 1.367886  |
| 46 | 1 | 0 | -1.013327 | 1.644795 | 2.547163  |
| 47 | 1 | 0 | -1.508957 | 2.882669 | 4.606202  |
| 48 | 1 | 0 | -4.645403 | 5.001758 | 2.586047  |
| 49 | 1 | 0 | -4.143815 | 3.776999 | 0.520746  |
| 50 | 6 | 0 | -3.400292 | 4.824064 | 5.017935  |
| 51 | 1 | 0 | -2.964710 | 5.830037 | 4.972313  |
| 52 | 1 | 0 | -4.477024 | 4.946899 | 5.173169  |
| 53 | 1 | 0 | -2.986040 | 4.327977 | 5.900178  |
| 54 | 6 | 0 | -2.099870 | 5.116218 | -4.786381 |
| 55 | 1 | 0 | -2.027741 | 4.503556 | -5.690021 |

|    |    |   |           |           |           |
|----|----|---|-----------|-----------|-----------|
| 56 | 1  | 0 | -3.002310 | 5.732795  | -4.883763 |
| 57 | 1  | 0 | -1.243033 | 5.796399  | -4.768625 |
| 58 | 1  | 0 | -3.275389 | 1.230256  | -2.459616 |
| 59 | 6  | 0 | 2.320614  | -1.796430 | 0.028500  |
| 60 | 6  | 0 | 3.362546  | -0.673759 | 0.010409  |
| 61 | 6  | 0 | 2.752974  | 0.566655  | 0.059158  |
| 62 | 6  | 0 | 5.231983  | 0.707342  | 0.026887  |
| 63 | 6  | 0 | 4.765501  | -0.600492 | -0.001178 |
| 64 | 16 | 0 | 3.888939  | 1.869039  | 0.092401  |
| 65 | 1  | 0 | 5.432792  | -1.454261 | -0.034789 |
| 66 | 6  | 0 | 10.516364 | 1.241160  | -0.013617 |
| 67 | 6  | 0 | 13.420313 | -1.087225 | -0.178936 |
| 68 | 6  | 0 | 12.329438 | -1.975869 | -0.271454 |
| 69 | 6  | 0 | 12.504227 | -3.345265 | -0.389949 |
| 70 | 6  | 0 | 13.809636 | -3.845500 | -0.415778 |
| 71 | 6  | 0 | 14.899978 | -2.975291 | -0.322566 |
| 72 | 6  | 0 | 14.723047 | -1.591662 | -0.202978 |
| 73 | 6  | 0 | 12.905894 | 0.306102  | -0.068628 |
| 74 | 6  | 0 | 11.450441 | 0.225592  | -0.089683 |
| 75 | 6  | 0 | 11.077967 | -1.188976 | -0.222086 |
| 76 | 1  | 0 | 11.642024 | -4.000962 | -0.461004 |
| 77 | 1  | 0 | 13.979230 | -4.913834 | -0.507892 |
| 78 | 1  | 0 | 15.908556 | -3.376757 | -0.342644 |

|     |   |   |           |           |           |
|-----|---|---|-----------|-----------|-----------|
| 79  | 1 | 0 | 15.587333 | -0.945019 | -0.132518 |
| 80  | 1 | 0 | 10.884489 | 2.255417  | 0.060715  |
| 81  | 8 | 0 | 9.936955  | -1.645242 | -0.279695 |
| 82  | 6 | 0 | 13.719425 | 1.427343  | 0.026525  |
| 83  | 6 | 0 | 13.206977 | 2.755090  | 0.126551  |
| 84  | 7 | 0 | 12.863209 | 3.865745  | 0.208355  |
| 85  | 6 | 0 | 15.141894 | 1.344053  | 0.029070  |
| 86  | 7 | 0 | 16.305955 | 1.287602  | 0.031959  |
| 87  | 6 | 0 | 2.726878  | -2.915500 | -3.635888 |
| 88  | 6 | 0 | 2.154220  | -4.192430 | -3.639647 |
| 89  | 6 | 0 | 1.659669  | -4.683973 | -2.425413 |
| 90  | 6 | 0 | 1.740715  | -3.933480 | -1.253838 |
| 91  | 6 | 0 | 2.318540  | -2.656013 | -1.252664 |
| 92  | 6 | 0 | 2.808469  | -2.159956 | -2.466746 |
| 93  | 1 | 0 | 3.117877  | -2.501760 | -4.562324 |
| 94  | 1 | 0 | 1.206787  | -5.672080 | -2.392693 |
| 95  | 1 | 0 | 1.361790  | -4.353853 | -0.327633 |
| 96  | 6 | 0 | 1.830517  | -2.431271 | 2.482855  |
| 97  | 6 | 0 | 2.119085  | -3.162971 | 3.636976  |
| 98  | 6 | 0 | 3.127609  | -4.130277 | 3.653577  |
| 99  | 6 | 0 | 3.845798  | -4.338339 | 2.467564  |
| 100 | 6 | 0 | 3.561441  | -3.612385 | 1.315024  |
| 101 | 6 | 0 | 2.544198  | -2.644506 | 1.299402  |

|     |   |   |           |           |           |
|-----|---|---|-----------|-----------|-----------|
| 102 | 1 | 0 | 1.042222  | -1.687535 | 2.513331  |
| 103 | 1 | 0 | 1.545625  | -2.973066 | 4.541022  |
| 104 | 1 | 0 | 4.641794  | -5.078877 | 2.446183  |
| 105 | 1 | 0 | 4.132268  | -3.806306 | 0.411976  |
| 106 | 6 | 0 | 3.422599  | -4.939855 | 4.893656  |
| 107 | 1 | 0 | 2.976013  | -5.940149 | 4.832308  |
| 108 | 1 | 0 | 4.499563  | -5.076855 | 5.034833  |
| 109 | 1 | 0 | 3.022935  | -4.457654 | 5.790217  |
| 110 | 6 | 0 | 2.100415  | -5.022440 | -4.899992 |
| 111 | 1 | 0 | 2.014016  | -4.392728 | -5.790569 |
| 112 | 1 | 0 | 3.008697  | -5.626904 | -5.017071 |
| 113 | 1 | 0 | 1.251251  | -5.712316 | -4.888894 |
| 114 | 1 | 0 | 3.256049  | -1.172426 | -2.504534 |
| 115 | 6 | 0 | -0.288296 | -1.400832 | 0.046616  |
| 116 | 6 | 0 | 1.024203  | -0.954808 | 0.062953  |
| 117 | 6 | 0 | 1.313372  | 0.435955  | 0.075828  |
| 118 | 6 | 0 | 0.290710  | 1.395529  | 0.085071  |
| 119 | 1 | 0 | -0.518164 | -2.460963 | 0.011282  |
| 120 | 1 | 0 | 0.520944  | 2.456173  | 0.078849  |
| 121 | 6 | 0 | 9.137937  | 1.235584  | -0.020881 |
| 122 | 6 | 0 | 8.474284  | 2.470560  | 0.077128  |
| 123 | 6 | 0 | 7.089466  | 2.403049  | 0.119337  |
| 124 | 6 | 0 | 6.591820  | 1.098833  | 0.059439  |

|     |    |   |           |           |           |
|-----|----|---|-----------|-----------|-----------|
| 125 | 16 | 0 | 7.897646  | -0.080900 | -0.062278 |
| 126 | 6  | 0 | -6.582517 | -1.082711 | 0.038696  |
| 127 | 6  | 0 | -7.083786 | -2.378731 | 0.022411  |
| 128 | 6  | 0 | -8.473740 | -2.436024 | 0.014948  |
| 129 | 6  | 0 | -9.123090 | -1.185238 | 0.011056  |
| 130 | 16 | 0 | -7.886967 | 0.107558  | -0.030197 |
| 131 | 8  | 0 | -6.290006 | -3.482395 | -0.026087 |
| 132 | 8  | 0 | -9.152039 | -3.598937 | 0.081646  |
| 133 | 8  | 0 | 9.159087  | 3.630168  | 0.157628  |
| 134 | 8  | 0 | 6.287442  | 3.497516  | 0.167308  |
| 135 | 6  | 0 | -6.964896 | -4.742669 | -0.149594 |
| 136 | 6  | 0 | -8.366094 | -4.726108 | 0.489380  |
| 137 | 1  | 0 | -6.344507 | -5.488509 | 0.349517  |
| 138 | 1  | 0 | -7.014247 | -4.998345 | -1.211475 |
| 139 | 1  | 0 | -8.306438 | -4.715642 | 1.580733  |
| 140 | 1  | 0 | -8.915181 | -5.615272 | 0.177370  |
| 141 | 6  | 0 | 6.920691  | 4.768564  | -0.020727 |
| 142 | 6  | 0 | 8.397333  | 4.818036  | 0.419170  |
| 143 | 1  | 0 | 6.824859  | 5.044635  | -1.075795 |
| 144 | 1  | 0 | 6.343750  | 5.482490  | 0.566958  |
| 145 | 1  | 0 | 8.890821  | 5.625104  | -0.126096 |
| 146 | 1  | 0 | 8.484913  | 5.021449  | 1.488583  |

-----
